# Supplementary material for: Age-associated bimodal transcriptional drift reduces intergenic disparities in transcription
Source: Aging (Albany NY). 2018 Apr 27;10(4):789–807. doi: 10.18632/aging.101428 (PMC5940109; doi:10.18632/aging.101428)
Supplement: Supplementary Data File 1 [file aging-10-101428-s002.xlsx]

## Sheet: mapping_stat
	Table S1. Mapping statistics for SiNG-PCRseq in muscle samples
	Muscle	uniq	multi	unmapped	total	% uniq	% multi	% unmapped
	ho_1_1	4061747	157	1127757	5189661	0.783	0	0.217
	ho_1_2	3991082	58	1211560	5202700	0.767	0	0.233
	ho_1_3	6423107	225	1749384	8172716	0.786	0	0.214
	ho_2_1	3469232	44	1024021	4493297	0.772	0	0.228
	ho_2_2	8004268	118	1978349	9982735	0.802	0	0.198
	ho_2_3	6429427	128	1607494	8037049	0.8	0	0.2
	ho_3_1	3246032	45	892682	4138759	0.784	0	0.216
	ho_3_2	6492359	91	1592800	8085250	0.803	0	0.197
	ho_3_3	4305839	130	1036665	5342634	0.806	0	0.194
	wo_1_1	4170336	55	964390	5134781	0.812	0	0.188
	wo_1_2	4535788	94	1324768	5860650	0.774	0	0.226
	wo_1_3	4262936	62	1108484	5371482	0.794	0	0.206
	wo_2_1	3628279	42	1133552	4761873	0.762	0	0.238
	wo_2_2	4283121	70	1229623	5512814	0.777	0	0.223
	wo_2_3	4962310	99	1290017	6252426	0.794	0	0.206
	wo_3_1	3419056	53	1130976	4550085	0.751	0	0.249
	wo_3_2	6709772	89	1867810	8577671	0.782	0	0.218
	wo_3_3	7508041	190	1918529	9426760	0.796	0	0.204
	hy_1_1	4482899	106	1133187	5616192	0.798	0	0.202
	hy_1_2	4137230	57	1150864	5288151	0.782	0	0.218
	hy_1_3	4458383	84	1155197	5613664	0.794	0	0.206
	hy_2_1	3319359	53	869059	4188471	0.792	0	0.207
	hy_2_2	4693636	79	1372180	6065895	0.774	0	0.226
	hy_2_3	6941510	109	1837575	8779194	0.791	0	0.209
	hy_3_1	3143481	34	952250	4095765	0.767	0	0.232
	hy_3_2	7875345	157	2196652	10072154	0.782	0	0.218
	hy_3_3	5127785	171	1340739	6468695	0.793	0	0.207
	wy_1_1	4573621	70	1207042	5780733	0.791	0	0.209
	wy_1_2	7085994	119	1675279	8761392	0.809	0	0.191
	wy_1_3	6196619	154	1644621	7841394	0.79	0	0.21
	wy_2_1	4261615	70	1049940	5311625	0.802	0	0.198
	wy_2_2	11194302	205	3211510	14406017	0.777	0	0.223
	wy_2_3	4506326	75	1135560	5641961	0.799	0	0.201
	wy_3_1	2899410	36	1024490	3923936	0.739	0	0.261
	wy_3_2	6105900	96	1743753	7849749	0.778	0	0.222
	wy_3_3	6721451	110	1694492	8416053	0.799	0	0.201
	average	5211878	98	1405090	6617066	0.786	0	0.214
	Table S2. Mapping statistics for SiNG-PCRseq in brain samples
	Brain	uniq	mulit	unmapped	total	% uniq	% multi	% unmapped
	ho_1_1	6341760	156	1473166	7815082	0.811	0	0.189
	ho_1_2	6689181	149	1408363	8097693	0.826	0	0.174
	ho_1_3	7082422	80	1745005	8827507	0.802	0	0.198
	ho_2_1	4209304	181	956485	5165970	0.815	0	0.185
	ho_2_2	7417943	321	1329221	8747485	0.848	0	0.152
	ho_2_3	6754088	244	1528408	8282740	0.815	0	0.185
	ho_3_1	5461591	165	1217565	6679321	0.818	0	0.182
	ho_3_2	8751114	234	1643302	10394650	0.842	0	0.158
	ho_3_3	7529293	192	1710984	9240469	0.815	0	0.185
	wo_1_1	8234764	138	1728100	9963002	0.827	0	0.173
	wo_1_2	7047750	153	1270667	8318570	0.847	0	0.153
	wo_1_3	9175261	175	1957641	11133077	0.824	0	0.176
	wo_2_1	5334061	77	1479196	6813334	0.783	0	0.217
	wo_2_2	7161245	133	1523762	8685140	0.825	0	0.175
	wo_2_3	4044473	37	1051838	5096348	0.794	0	0.206
	wo_3_1	6968328	178	1674202	8642708	0.806	0	0.194
	wo_3_2	7287970	89	1442766	8730825	0.835	0	0.165
	wo_3_3	6892375	103	1768495	8660973	0.796	0	0.204
	wo_4_1	7777893	186	1765666	9543745	0.815	0	0.185
	wo_4_2	6928332	210	1361110	8289652	0.836	0	0.164
	wo_4_3	6239687	102	1563509	7803298	0.8	0	0.2
	hy_1_1	7528082	231	1698005	9226318	0.816	0	0.184
	hy_1_2	6600541	144	1303957	7904642	0.835	0	0.165
	hy_1_3	7609301	93	1801281	9410675	0.809	0	0.191
	hy_2_1	7332958	163	1747189	9080310	0.808	0	0.192
	hy_2_2	7092903	186	1529172	8622261	0.823	0	0.177
	hy_2_3	6584784	76	1670474	8255334	0.798	0	0.202
	hy_3_1	7524569	214	1741547	9266330	0.812	0	0.188
	hy_3_2	6136130	106	1279919	7416155	0.827	0	0.173
	hy_3_3	7620801	85	1775722	9396608	0.811	0	0.189
	hy_4_1	6458819	180	1453760	7912759	0.816	0	0.184
	hy_4_2	7681079	218	1390866	9072163	0.847	0	0.153
	hy_4_3	7441938	80	1705105	9147123	0.814	0	0.186
	wy_1_1	7059558	138	1866142	8925838	0.791	0	0.209
	wy_1_2	6466495	112	1448212	7914819	0.817	0	0.183
	wy_1_3	8189792	75	1913285	10103152	0.811	0	0.189
	wy_2_1	7890641	286	1701242	9592169	0.823	0	0.177
	wy_2_2	6950602	221	1184047	8134870	0.854	0	0.146
	wy_2_3	6019630	86	1217641	7237357	0.832	0	0.168
	wy_3_1	7632964	231	1806805	9440000	0.809	0	0.191
	wy_3_2	7730443	240	1433982	9164665	0.844	0	0.156
	wy_3_3	7295550	65	1651892	8947507	0.815	0	0.185
	average	7004200	156	1545707	8550063	0.819	0	0.181
	Table S3. Mapping statistics for SiNG-PCRseq in splenic T cells
	T cells	uniq	multi	unmapped	total	% uniq	% multi	% unmapped
	ho_1	24351619	164313	6095812	30611744	0.795	0.005	0.199
	ho_2	24342382	209224	6235247	30786853	0.791	0.007	0.203
	ho_3	18018478	109002	4737062	22864542	0.788	0.005	0.207
	ho_4	26311107	168404	6817480	33296991	0.79	0.005	0.205
	wo_1	22746153	179886	5517320	28443359	0.8	0.006	0.194
	wo_2	22927759	184112	5902616	29014487	0.79	0.006	0.203
	wo_3	27800219	208384	7314225	35322828	0.787	0.006	0.207
	wo_4	21821285	150784	6362537	28334606	0.77	0.005	0.225
	hy_1	22227785	149550	6101660	28478995	0.78	0.005	0.214
	hy_2	22294117	184711	6676291	29155119	0.765	0.006	0.229
	hy_3	23017243	173499	6873150	30063892	0.766	0.006	0.229
	hy_4	21125764	154627	6463057	27743448	0.761	0.006	0.233
	wy_1	24384322	167989	7633504	32185815	0.758	0.005	0.237
	wy_2	24035822	216925	7144032	31396779	0.766	0.007	0.228
	wy_3	22224095	197451	7879561	30301107	0.733	0.007	0.26
	wy_4	18648546	147362	6149077	24944985	0.748	0.006	0.247
	average	22892294	172889	6493914	29559097	0.774	0.006	0.22

## Sheet: MR_ratio_expression_level
amplicon_id	wy_mus1	wy_mus2	wy_mus3	wy_mus4	wy_mus5	wy_mus6	wo_mus1	wo_mus2	wo_mus3	wo_mus4	wo_mus5	wo_mus6	hy_mus1	hy_mus2	hy_mus3	hy_mus4	hy_mus5	hy_mus6	ho_mus1	ho_mus2	ho_mus3	ho_mus4	ho_mus5	ho_mus6			amplicon_id	wy_br1	wy_br2	wy_br3	wy_br4	wy_br5	wy_br6	wy_br7	wy_br8	wy_br9	wo_br1	wo_br2	wo_br3	wo_br4	wo_br5	wo_br6	wo_br7	wo_br8	wo_br9	wo_br10	wo_br11	wo_br12	hy_br1
Ash1l_4015_4087	6.28737	5.55059	6.26861	6.7661	3.99803	4.72767	5.58732	6.95439	5.93902	6.46022	4.2407	4.30251	6.04524	6.59913	5.93934	6.25617	5.54211	5.27278	3.51099	4.89557	0	8.19323	6.14921	8.562			Ash1l_4860_4904	3.5005	3.48054	2.96794	0	0	0	0	0	0	6.17854	0	0	4.10507	5.03047	3.99118	5.26201	4.3626	4.20353	0	0	6.84473	0
Ash1l_4860_4904	2.23112	2.03624	2.58892	2.88327	2.46073	3.07075	3.09291	2.91364	1.90077	2.25597	2.66071	3.07757	3.15052	2.90614	2.33489	2.56646	1.8982	1.9686	2.10375	2.29667	2.45047	2.25954	2.10782	2.58493			Asxl1_2447_2498	0.285532	0.387509	0.483177	0.564957	0.660375	0.565282	0.585852	0.600012	0.771364	0.591513	0.691668	0.884117	0.314267	0.432657	0.496098	0.327747	0.447612	0.379158	0.448823	0.553438	0.460465	0.461908
Asxl1_2447_2498	0.0362721	0.0462472	0.0896077	0.0600068	0.086016	0.0654868	0.0874357	0.0519859	0.0779602	0.0628809	0.143806	0.0889096	0.070275	0.0812403	0.0857004	0.0386944	0.0640721	0.0610562	0.0753305	0.156882	0.0741388	0.057727	0.0884867	0.0709174			Asxl1_4208_4285	0.655782	0.859272	0.813641	1.97228	1.59279	1.46469	1.43722	1.23711	0.93237	1.33686	1.05102	0.789822	0.871387	0.821019	0.593893	1.09015	1.03133	1.01724	1.88258	1.26822	1.33994	1.62088
Asxl1_4208_4285	0.368468	0.309257	0.313757	0.30316	0.109604	0.0569354	0.388961	0.469404	0.518282	0.264981	0.249543	0.23316	0.283917	0.307033	0.350947	0.185983	0.218692	0.260392	0.138418	0.0879351	0.455097	0.348678	0.491356	0.521095			Bap1_2135_2211	1.4593	1.61647	1.55144	2.93174	2.85379	2.65414	1.53119	1.30084	1.31787	1.08039	1.00872	0.796437	1.11044	1.17059	0.98458	1.0993	1.01888	0.943147	2.31858	2.62415	2.00102	2.17299
Bap1_2135_2211	0.798633	0.645018	0.852623	1.03618	0.544292	0.578321	0.746144	0.985077	0.623929	0.713114	0.542397	0.553473	0.880607	0.751204	0.65399	0.585176	0.736446	0.863829	0.4615	0.591255	0.818018	0.678031	0.692565	0.876589			Bap1_885_944	0.842775	0.931418	1.15171	2.14871	2.3295	1.9744	1.6455	1.57526	1.74174	1.49361	1.44725	1.12197	1.3275	0.955557	1.11932	1.10649	0.994081	0.826419	1.44743	1.86682	1.49854	1.43026
Bap1_885_944	0.652704	0.652801	0.909884	1.00204	0.59825	1.06416	1.37325	1.09572	0.616138	0.73048	0.763037	0.700554	0.623641	0.762344	0.598808	0.721285	0.743838	0.735999	0.386647	0.403295	0.809937	0.74688	0.769179	1.17851			Bmi1_474_543	1.0427	1.11065	1.30829	2.68885	2.60213	3.06508	1.93798	1.66109	1.73608	1.3044	1.1166	1.26466	1.60873	2.12126	2.14711	2.70332	2.53142	2.46881	4.07511	3.60458	3.10082	1.91686
Bmi1_474_543	4.60268	4.5795	6.87005	5.59865	3.05278	3.3708	7.5033	7.17159	7.21776	8.18146	4.82669	4.50397	5.17537	5.52478	4.79527	4.56498	4.76047	3.58045	1.71895	2.45281	10.2414	6.51281	8.29371	7.82406			Brms1_97_145	1.22489	1.11141	1.24862	2.11251	1.84986	1.65293	1.43497	1.67136	1.40773	1.69962	1.61726	0.860709	1.18333	1.02041	1.10934	1.16104	0.973922	0.757421	2.06298	2.43662	1.98406	1.72184
Brms1_97_145	0.229542	0.224706	0.254323	0.360426	0.116944	0.129777	0.289769	0.357672	0.219433	0.258107	0.226469	0.168209	0.236934	0.210943	0.161777	0.211909	0.207935	0.249995	0.205152	0.215643	0.322779	0.363408	0.276671	0.340582			Capza1_66_160	1.22832	2.03507	1.69128	3.93345	3.80704	3.70168	3.23879	2.20155	2.42285	2.4567	3.05765	2.59269	1.92024	1.83832	1.59553	2.87261	1.86802	2.58928	3.15241	2.9763	2.17137	3.06268
Capza1_66_160	0.230084	0.245162	0.317934	0.379775	0.247928	0.133731	0.148478	0.127108	0.0637834	0.0579888	0.304098	0.234289	0.376132	0.15019	0.133946	0.436302	0.392945	0.301943	0.119313	0.268989	0.527537	0.471908	0.450784	0.398094			Carm1_1439_1505	0.721729	0.535925	0.810463	0.850613	1.1155	0.940562	0.709396	0.99139	0.778929	0.970055	1.31515	1.09406	0.409945	0.715566	0.529456	0.43932	0.590313	0.470081	0.591474	0.877746	0.709189	0.75005
Carm1_1439_1505	0.782836	0.749951	1.0205	1.11485	0.562614	0.56518	1.27868	1.17612	0.628052	0.54385	0.583381	0.405927	0.695683	0.663027	0.59673	0.604415	0.844144	0.683282	0.478321	0.447499	0.903604	0.814448	0.842043	1.15872			Carm1_649_719	0.666724	0.713294	0.762129	1.78612	1.15901	1.47727	1.19853	1.20346	0.841315	1.2771	1.02696	0.994193	0.668907	0.769671	0.693368	0.843523	0.571621	0.639574	1.03136	1.05954	0.786051	1.27754
Carm1_649_719	1.47433	1.38091	1.65549	1.80701	0.88437	1.10033	1.37437	1.53119	1.20893	1.39647	0.938227	0.908291	1.39176	1.6657	1.19849	1.16537	1.31096	1.35307	0.385433	0.479163	1.43696	1.08952	1.31076	1.51062			Casp1_1004_1060	0.083765	0.0976475	0.0740484	0.250587	0.202312	0.213824	0.321296	0.203244	0.249061	0.173666	0.178453	0.118476	0.129516	0.192951	0.132688	0.532065	0.296181	0.344866	0.426602	0.451466	0.360415	0.138386
Casp1_1004_1060	0.130137	0.0981815	0.114857	0.0903615	0.0885634	0.103811	0.116776	0.1424	0.213932	0.166164	0.0996518	0.110659	0.135199	0.101353	0.0821171	0.0743609	0.115695	0.126755	0.0650709	0.0527156	0.224016	0.20808	0.29163	0.306995			Casp1_859_934	0.0179623	0.0280533	0.0200816	0.0741274	0.100507	0.0830135	0.0602843	0.04192	0.0608999	0.0240481	0.0339593	0.0387751	0.0776165	0.0633368	0.0503211	0.149801	0.172536	0.112654	0.146151	0.142325	0.126903	0.0293977
Casp1_859_934	0.0400458	0.0255533	0.0509804	0.0402293	0.0177922	0.011536	0.0398285	0.038974	0.0516698	0.0464866	0.016113	0.0123694	0.037693	0.0401793	0.0480463	0.040517	0.0490036	0.0457017	0.024534	0.0185576	0.0682543	0.0586212	0.0897842	0.119457			Cbx1_358_531	4.60454	5.04967	5.20467	0	0	0	0	6.59411	0	4.24987	4.97017	4.79424	6.9381	4.51027	6.95137	0	0	0	0	0	0	0
Cbx1_358_531	5.84906	5.9751	8.48508	9.1147	1.84635	2.02298	5.09138	5.58225	6.07072	6.24341	2.37149	2.23101	5.39303	5.32777	4.76992	5.38599	6.51382	6.69279	0.769372	0.903706	7.3247	6.78778	6.18554	7.58746			Cbx4_337_412	0	0	0	0.672275	1.28044	0	1.54511	2.16465	4.09801	0	1.80994	4.73776	0	0	6.24778	0	0	1.04229	0	2.36099	3.06129	1.82319
Cbx5_5635_5687	0.108103	0.0778279	0.155571	0.146978	0.262661	0.215326	0.21127	0.135192	0.185478	0.131823	0.158715	0.190225	0.163422	0.197283	0.170156	0.129392	0.160455	0.138238	0.136554	0.173705	0.293188	0.147615	0.229967	0.207388			Cbx5_5635_5687	0.339459	0.219394	0.296819	0.777103	0.714647	0.72497	0.687844	0.487028	0.566546	0.529192	0.374451	0.418104	0.331203	0.342778	0.212991	0.417943	0.318299	0.266596	0.634347	0.513747	0.464774	0.68213
Cbx6_1280_1342	0.641518	0.702463	0.859154	0.802559	1.45022	1.53522	0.784102	0.838809	0.687079	0.823817	0.761896	0.903636	0.920102	0.849863	0.824473	0.732285	0.890124	0.830688	0.65188	0.977813	0.626937	0.487213	0.770945	0.801438			Cbx6_1280_1342	5.98846	5.42083	4.91349	0	0	0	0	0	0	0	0	0	5.49598	6.59556	5.39724	4.61671	4.43784	3.91176	5.21467	0	0	0
Cbx7_3461_3537	0.384401	0.313797	0.486399	0.466568	0.176538	0.203814	0.43374	0.437299	0.343882	0.31419	0.327992	0.312864	0.504882	0.420903	0.28927	0.325412	0.39119	0.382793	0.288753	0.256835	0.576966	0.541351	0.503416	0.518074			Cbx7_3461_3537	0.577863	0.509378	0.627267	0.972604	0.987109	1.02803	0.919799	0.945296	0.934796	1.07077	1.41354	0.830758	0.570362	0.831907	0.769641	0.568092	0.656973	0.754861	0.639996	0.705357	0.698657	0.872172
Cbx8_983_1051	0.0462254	0.0601507	0.103662	0.0767696	0.0448355	0.053956	0.0612227	0.0543178	0.0395627	0.0452679	0.00620169	0.0129296	0.0618429	0.0514329	0.059101	0.0595977	0.0297246	0.0390653	0.0291394	0.0452663	0.0561977	0.0567862	0.0528882	0.0427627			Cbx8_983_1051	0.194074	0.279716	0.188079	0.484585	0.558193	0.423268	0.189913	0.217043	0.170926	0.16783	0.152576	0.142173	0.101681	0.132279	0.0989032	0.226068	0.163064	0.180738	0.355121	0.322406	0.27739	0.318072
Cd44_1452_1542	0.00814326	0.00812401	0.00733681	0.0108901	0.0245187	0.0390694	0.0108939	0.0259404	0.0168931	0.0292064	0.0231101	0.0420797	0.020247	0.0184124	0.0104659	0.0227634	0.00900092	0.00733209	0.052728	0.0154683	0.0112718	0.00815677	0.00301443	0.00724176			Cd44_1452_1542	0.00772574	0.00118094	0.00027532	0.00971414	0.0171241	0.0133018	0.018537	0.014287	0.0209848	0.0091197	0.00446282	0.00398514	0	0.00861946	0.000548294	0.0224217	0.0259445	0.0250787	0.0164295	0.0133164	0.00459482	0.0247295
Cdx2_302_350	0.00380603	0.00323143	0.00718131	0.00221111	0.00405937	0.00411202	0.00347884	0.00295616	0.00293056	0.00377533	0.00320633	0.00485363	0.0041557	0.00505042	0.00618891	0.00348107	0.00373143	0.00726399	0.0141713	0.010049	0.00311562	0.00205508	0.0026491	0.00324073			Cdx2_302_350	0.0046174	0.00274557	0.00479941	0.000546081	0.00573429	0.00204878	0.0193568	0.00634971	0.00893743	0.00502071	0.000951765	0.00286689	0.00233592	0.00812077	0.00784179	0.0221001	0.0238345	0.00630849	0.00383177	0.00847976	0.00621023	0.00559521
Clu_495_560	1.9747	1.78122	2.04077	2.695	1.11104	1.34271	2.73469	3.08892	2.27651	1.90437	0.570489	0.617325	2.5126	2.68299	1.72749	1.81244	1.86489	1.90106	0.974359	1.03628	2.12975	1.83057	2.07042	2.45574			Crebbp_2139_2215	2.10448	2.31988	2.20998	0	0	0	4.61284	0	5.28308	4.03344	3.95383	4.21349	2.75537	3.02591	2.88066	2.75596	2.70257	2.88578	4.66534	0	4.53973	0
Clu_668_730	1.93671	1.74597	2.18903	2.08478	2.94934	3.28236	3.16186	3.10597	1.93893	1.92257	0.876687	1.01404	2.8216	2.82763	2.42264	2.2367	1.60953	1.80346	1.4254	1.67502	1.61769	1.52732	1.82909	2.11485			Crebbp_4197_4275	1.60996	1.65108	1.71485	4.73622	0	4.23209	3.4447	2.52918	2.73469	2.46617	2.10325	1.48629	1.7998	1.91149	1.66987	2.18691	1.98786	2.03226	3.99578	3.97598	3.21124	3.82123
Crebbp_2139_2215	1.71999	1.5166	2.13532	1.98666	1.16327	1.15217	2.31938	2.40374	1.57304	1.30177	1.05514	1.08917	1.87411	2.18516	1.48271	1.82316	1.48842	1.49094	1.11595	1.81769	1.83607	1.74224	1.76869	1.81729			Crebbp_7000_7095	1.57558	1.48474	1.39897	3.84004	3.94464	3.29803	3.34016	3.47182	3.41454	2.66794	2.67154	2.47356	1.2911	2.019	1.57129	2.04142	1.51098	1.76446	2.45381	2.83215	2.42387	2.83624
Crebbp_4197_4275	1.08161	1.01435	1.35769	1.55428	0.743895	0.782691	1.33688	1.38239	1.0969	1.10485	0.864524	0.863949	1.30556	1.60576	0.940741	1.17546	1.11149	1.26484	0.725182	0.743934	1.42218	1.14066	1.18072	1.35969			Crebbp_7723_7791	3.25435	3.76428	3.15485	4.77564	5.17659	0	5.06934	3.99471	3.74131	5.61708	4.21515	3.09072	3.29457	3.32634	2.48437	2.31761	3.3153	2.17133	4.2621	4.13356	2.7634	4.01542
Crebbp_7000_7095	1.12613	1.14184	1.92332	1.63195	0.722821	0.768155	1.69596	1.63814	1.18758	1.10509	0.752856	0.770586	1.83061	1.62326	1.32116	1.50072	1.19261	1.31051	0.632768	0.562019	1.41535	1.21336	1.22137	1.36647			Dctn1_1782_1836	2.63049	2.96014	2.65378	5.24668	0	4.37848	0	4.24484	3.65108	4.67194	3.76136	3.51376	3.75287	4.07128	3.41235	4.17459	3.79845	3.06143	4.03582	0	3.98662	0
Crebbp_7723_7791	2.91832	2.44475	3.08271	2.51721	3.01111	3.1248	3.51588	3.59878	2.97429	2.28808	3.01667	3.51881	3.09729	3.41095	2.64712	2.77427	1.96045	2.00667	2.57282	2.84227	2.89044	2.76117	2.84153	3.76015			Dctn1_2008_2078	3.04882	3.05928	2.72259	0	0	0	0	6.23572	5.50366	5.89875	4.47728	4.73338	5.73874	5.82976	5.04382	4.53062	4.01111	3.92912	0	7.11466	5.61795	0
Dctn1_1782_1836	1.78016	1.65247	2.87541	2.29836	0.7155	0.683981	1.96543	2.20977	1.61451	1.70388	1.01095	0.786147	1.83873	1.81551	1.40022	1.64389	2.07273	1.80576	1.6119	1.89273	2.26606	2.04092	2.00675	2.48895			Dgcr8_3335_3398	2.03938	2.0024	2.09314	0	4.45067	4.2826	3.57756	3.05123	2.45196	2.43202	1.97556	1.17342	2.57319	2.31521	2.28101	4.55616	4.71515	4.23761	0	0	4.56463	4.36417
Dctn1_2008_2078	2.43896	2.65551	4.15239	4.12455	1.22028	1.41081	3.73583	3.21235	2.50158	2.32968	1.36327	1.43513	2.85614	2.77155	2.33658	2.37863	2.97642	2.95873	1.81715	1.98874	3.21844	3.03119	3.15616	3.01736			Dicer1_4351_4394	0.256286	0.319105	0.259542	0.555474	0.486915	0.492978	0.525736	0.54152	0.543361	0.408416	0.409942	0.321861	0.210245	0.266823	0.198317	0.322285	0.255306	0.229217	0.433916	0.33923	0.43064	0.671745
Dgcr8_3335_3398	0.893422	1.13756	0.882948	1.34627	1.151	1.55251	0.928425	0.969991	0.793726	1.06736	0.998496	1.01382	1.21433	0.992201	1.30837	1.18349	1.00925	0.971492	0.823053	1.09271	0.905714	1.04336	0.913869	1.19512			Dmap1_153_236	1.30061	0.8245	1.00969	1.19744	1.67937	1.03575	0.983774	0.751316	1.082	1.08755	0.877971	0.850545	0.992552	1.27594	2.67853	1.18326	0.969572	1.40878	1.84408	1.05031	1.32012	1.22052
Dicer1_4351_4394	0.13458	0.171517	0.384498	0.331886	0.158522	0.153839	0.320292	0.350239	0.162421	0.169094	0.170138	0.14944	0.271629	0.270165	0.192072	0.247478	0.285445	0.270019	0.406686	0.337594	0.214699	0.198862	0.160984	0.215198			Dmap1_1786_1851	7.37487	7.20382	0	0	0	0	0	0	0	0	0	6.93197	0	0	5.95918	0	0	0	0	0	0	0
Dmap1_1786_1851	2.80778	2.24688	3.12673	3.20895	3.6337	3.72176	3.20483	3.27701	3.10916	2.80863	3.91374	3.51666	3.48706	2.76359	3.5285	3.65947	2.70523	2.56251	5.85072	5.91541	2.9796	2.64332	2.85246	3.06512			Dnmt1_2433_2486	0.406347	0.370179	0.397826	0.988054	1.1187	1.07148	0.816973	0.661062	0.947079	0.617562	0.564524	0.620779	0.439464	0.468172	0.499825	0.627592	0.500772	0.517681	0.889681	0.901493	0.808679	0.921459
Dnmt1_2433_2486	0.0497056	0.0634985	0.0765907	0.0676415	0.0408137	0.0645459	0.0745474	0.0647237	0.0204109	0.0382494	0.0305713	0.0338496	0.0373127	0.044314	0.0516677	0.0375395	0.104697	0.0553774	0.0833179	0.0381858	0.0451705	0.0572919	0.0453469	0.0811045			Dnmt3a_2825_2887	0.598848	0.834463	0.646607	0.661988	0.821543	0.000247784	0.595232	0.693215	0.606452	0.663656	0.766459	0.556748	0.548685	0.664656	0.522162	1.19836	0.638181	0.515713	0.515324	0.628751	0.502537	0.618271
Dnmt3a_2825_2887	1.08979	1.03227	1.20506	1.38392	0.84921	1.09087	0.908554	0.908049	0.850309	0.845055	0.675131	0.676552	0.981916	1.08124	1.05565	1.125	0.941209	1.00897	1.74063	2.19909	0.813891	0.798274	0.718893	0.86695			Dnmt3b_2708_2809	0.0824543	0.111844	0.111872	0.161157	0.117857	0.0678634	0.152697	0.113098	0.0781567	0.104439	0.0849883	0.0702917	0.026615	0.0303159	0.0434159	0.0869416	0.0992225	0.0917236	0.143363	0.0794142	0.0979097	0.203293
Dnmt3b_2708_2809	0.00385224	0.0173129	0.039049	0.0104109	0.000716676	0.00185005	0.0173733	0.00384338	0.00125177	0.00624169	0.0312072	0.0116028	0.00581447	0.0307382	0.00351661	0.0169078	0.030845	0.00533354	0.005172	0.00302303	0.0241952	0.0180299	0.0187634	0.0432679			Dnmt3l_1303_1377	0.000338678	0.000446985	0.000960679	0.00613175	0.00949529	0.00287584	0.0160913	0.00583488	0.00652853	0.0119322	0.0068176	0.00184711	0.00209342	0.00113473	0.0102485	0.0366567	0	0.0191273	0.00744285	0.00214389	0.00595616	0.0023337
Dnmt3l_1303_1377	0.0238225	0.0307995	0.0264629	0.0259996	0.0100554	0.00346867	0.0104611	0.0111802	0.00730486	0.0193964	0.00438355	0.00415975	0.0151928	0.0218142	0.0161658	0.0198453	0.0313642	0.00996206	0.0192577	0.0120606	0.0218568	0.0124547	0.0222111	0.0221435			Dot1l_1156_1202	0.372419	0.304901	0.385302	0.544845	0.876769	0.613	0.786624	0.754952	0.691497	0.698794	0.627416	0.629599	0.463637	0.518423	0.437409	0.417698	0.438523	0.370386	0.538848	0.513248	0.366563	0.848396
Dot1l_1156_1202	0.0960075	0.117061	0.185453	0.210697	0.0633599	0.104321	0.0810955	0.0808551	0.111545	0.120304	0.111959	0.0603589	0.142617	0.160336	0.125397	0.0583688	0.134405	0.14597	0.112142	0.129735	0.130811	0.126233	0.164558	0.155059			Eed_1316_1415	1.52616	1.78588	1.75614	0	0	4.40657	3.45741	2.66531	2.51333	1.71073	1.36333	1.16334	3.37036	3.59392	2.68699	5.55854	4.36134	5.92409	6.56673	6.7159	0	3.7541
Eed_1316_1415	6.78103	5.82362	7.34624	7.62172	6.14055	6.89109	5.13234	4.31079	9.30218	10.2582	9.85083	7.90364	6.49445	6.39159	8.98634	8.49933	6.72935	5.32452	2.85129	2.77482	8.39966	6.81995	6.61226	8.34198			Eed_738_808	0.516456	0.659453	0.627374	1.5847	1.52225	1.54975	0.948592	0.891414	0.745216	0.577647	0.318152	0.428933	0.966755	0.921654	1.04316	1.9449	1.43601	1.38921	1.74834	2.1465	1.60195	1.06676
Eed_738_808	1.62203	1.30208	2.01001	1.92858	0.572421	0.551941	1.36988	1.48434	2.02819	2.34596	0.780851	0.700344	1.26548	1.17132	1.12292	1.08523	1.45335	1.38303	0.428682	0.48695	2.31608	2.28371	2.18934	2.49835			Ehmt1_2340_2411	0.21335	0.281761	0.335376	0.715485	0.812237	0.65133	0.589461	0.482874	0.53957	0.388502	0.43712	0.376658	0.304623	0.353415	0.296496	0.395386	0.366313	0.296497	0.583234	0.597168	0.478541	0.726682
Ehmt1_2340_2411	0.153332	0.0868461	0.16702	0.155899	0.038752	0.0657367	0.124411	0.134963	0.105269	0.0699198	0.0724258	0.0438955	0.0921042	0.102985	0.0846163	0.08338	0.136613	0.105057	0.0677117	0.0720354	0.110128	0.12047	0.125561	0.151021			Ehmt2_961_1092	3.47621	3.52517	3.6659	3.5482	4.90949	3.16682	4.97442	4.01734	4.34608	4.87405	4.12808	3.72589	3.06268	2.68178	2.49366	2.52874	2.08792	2.34689	2.95544	2.62167	2.12596	3.70116
Ehmt2_961_1092	0.452684	0.387361	0.538225	0.562692	0.239181	0.261647	0.493594	0.64578	0.390671	0.491349	0.277211	0.252957	0.497836	0.463013	0.372624	0.424985	0.492662	0.522914	0.227782	0.475136	0.626239	0.523519	0.652557	0.652137			Elp3_1093_1168	0.593192	0.640691	0.701845	0	3.28515	1.4082	0	0.681134	0.701727	0.559687	0.522041	0.571738	0	0.928883	0.621419	0	0.861058	0.864075	0	0	1.45874	0
Elp3_1093_1168	0.535777	0.336061	0.739617	0.917021	0.234799	0.195136	0.608677	0.746898	0.563017	0.535877	0.319505	0.127295	0.679129	0.387062	0.449212	0.475438	0.505455	0	0.414835	0.422476	0.610307	0.475381	0.545465	0			Ep300_7470_7540	2.80839	2.99721	2.92545	0	7.54506	6.05139	5.8483	0	5.58735	3.55896	3.13016	3.26226	2.67265	3.00995	2.2221	3.25812	2.76548	2.64106	5.69683	5.62238	4.92777	5.48006
Ep300_7470_7540	2.5384	2.09525	2.97934	3.31615	1.39257	1.53503	2.78364	2.72239	1.73264	1.69716	1.03809	1.04749	3.11314	2.95245	2.52492	2.14422	1.80674	1.9979	0.885478	0.976958	2.24506	2.05667	1.69879	2.06384			Ezh1_1883_1955	0.458407	0.552394	0.4909	0.683705	0.818249	0.754664	0.600674	0.544847	0.556128	0.655071	0.719342	0.462156	0.462063	0.488981	0.41183	0.461631	0.527519	0.39226	0.841311	0.754418	0.646356	0.736112
Ezh1_1883_1955	0.491749	0.375641	0.545261	0.559913	0.318665	0.379987	0.53351	0.449517	0.303084	0.341606	0.563362	0.536592	0.413345	0.546113	0.379375	0.338269	0.511776	0.420937	0.41521	0.338628	0.543608	0.421024	0.458969	0.61371			Ezh2_165_242	1.45702	1.4868	1.21884	3.39842	3.32592	2.71607	1.6821	2.14802	1.88753	2.02935	1.93268	1.39919	1.38438	1.43461	1.25948	1.74747	1.90534	1.30088	3.5626	3.22442	2.503	2.45094
Ezh2_165_242	0.361238	0.325869	0.416942	0.407642	0.133753	0.147448	0.305311	0.338224	0.289681	0.368038	0.137127	0.177809	0.299901	0.355574	0.219777	0.224164	0.325334	0.374147	0.0711811	0.0431988	0.419676	0.395436	0.378728	0.423463			Foxd1_2290_2367	1.45098	0	1.55237	1.40258	2.60001	1.25998	1.32683	1.60317	1.00483	1.41228	1.18372	0.943575	1.30647	2.28903	1.23008	2.21049	2.75405	2.52127	1.54424	1.70105	1.37263	1.38562
Foxd1_2290_2367	0.377007	0.405336	0.25867	0.627152	0.710927	0.232324	0.348224	0	0.386711	0	0.116258	0	0.406316	0.214634	0.730427	0.272611	0.130837	0	0.409063	0.55826	0.830295	0.935456	0.439441	0			Foxd1_838_925	1.58268	0.937029	1.40955	1.08194	1.30009	0.82102	1.18231	1.078	0.966897	1.49287	1.37428	1.03439	0.937328	1.387	1.35758	1.56661	1.6749	1.47264	1.17272	1.2364	1.02422	1.30418
Foxd1_838_925	2.2591	1.53837	1.3766	1.49135	2.11276	2.3045	1.00061	0.990829	1.56363	1.24506	1.7122	1.64732	1.46839	1.57419	1.8761	1.87278	1.22461	2.31514	3.60333	6.57806	1.57224	1.11986	0.957792	0.954064			Gsg2_1288_1387	0.00868837	0.0104202	0.0114159	0.0318547	0.0160091	0.042379	0.0305701	0.0485446	0.0408285	0.00413002	0.00609959	0.0125291	0.00710218	0.0144027	0.0043732	0.029674	0.00979893	0.0191606	0.0211179	0.0137665	0.0329423	0.0340554
Gsg2_1288_1387	0.00814785	0.00882906	0.0102155	0.00584731	0.00836035	0.0261569	0.0085532	0.00810835	0.00569442	0.00723077	0.00895603	0.00699354	0.00917684	0.00885459	0.0109487	0.00709602	0.0109436	0.0075436	0.0178587	0.0177819	0.00463819	0.00538972	0.00498647	0.00937897			Gsg2_1988_2072	0.0254527	0.0293269	0.0352067	0.0858221	0.0733518	0.0583464	0.0826057	0.0843858	0.0761048	0.0142626	0.0196192	0.0228546	0.0372907	0.0590471	0.0436174	0.0553761	0.0562685	0.0449673	0.0569805	0.0665254	0.0324914	0.0958049
Gsg2_1988_2072	0.0206434	0.0177892	0.015655	0.0135983	0.012865	0.0148648	0.0121445	0.0222805	0.0141972	0.0145652	0.010413	0.0103299	0.0246754	0.0105128	0.0104179	0.0204531	0.0128312	0.0146904	0.0247083	0.0137702	0.00686912	0.0196473	0.0209225	0.0352425			Hdac1_205_288	0.64382	1.00169	1.03778	0.261992	0.694978	0.683671	0.549917	0.535683	0.544292	0.874147	0.520827	0.742898	0.592346	0.980885	0.960472	1.04343	0.627634	0.624807	0.174051	0.686276	1.36007	0.650084
Hdac1_205_288	1.03345	1.51509	0.976784	1.8458	2.99558	3.27285	1.33913	1.31074	1.57792	2.12435	1.95935	2.7566	1.94451	1.79033	2.63542	1.91993	1.73338	2.26745	4.4216	5.04655	1.29426	1.20641	1.20984	1.34414			Hdac1_455_549	0.936903	0.928176	0.955958	0.18673	0.673798	0.185242	0.702533	0.207782	0.686208	0.843463	0.236669	0.669754	0.910518	0.30683	0.300581	0.298102	1.22196	0.255994	0.190942	0.21916	0.205076	0.191452
Hdac1_455_549	0.615849	1.51748	0.422854	0.497029	0.561627	2.41151	0.314784	0.319697	0.42847	0.432207	2.05402	1.93197	1.84876	0.448739	0.49559	0.531739	0.420178	0.428191	1.18136	4.85446	0.350133	0.323392	0.277758	1.20826			Hdac11_1010_1082	2.13778	2.08632	2.02628	4.18678	4.16415	3.86852	2.21719	1.95407	1.96743	1.91832	1.50665	1.44244	1.76154	1.98776	1.58671	2.00677	1.54995	1.84604	3.40938	3.36375	3.21912	2.54814
Hdac10_1297_1368	0.117392	0.0544908	0.237278	0.136719	0.171727	0.254582	0.368075	0.208378	0.264055	0.278435	0.140571	0.187001	0.339565	0.154602	0.340312	0.173474	0.208406	0.214825	0.141606	0.144214	0.223658	0.118017	0.160957	0.178444			Hdac2_725_829	2.40637	2.45831	2.91977	4.72209	0	5.58316	3.19848	3.18606	3.77083	1.32735	1.39896	1.48037	3.19245	3.8705	4.34373	5.59897	0	7.34164	5.37766	0	0	3.90093
Hdac11_1010_1082	0.149595	0.152428	0.216256	0.190361	0.13817	0.135823	0.236479	0.24043	0.151292	0.156684	0.0846889	0.110556	0.117907	0.137611	0.148735	0.157886	0.228699	0.161749	0.133549	0.108629	0.354996	0.347955	0.414262	0.384083			Hdac3_1246_1318	2.61988	3.07971	3.10663	0	0	0	5.4343	3.79131	4.12225	3.63072	3.57919	3.12552	3.33538	4.00883	2.88688	5.94544	5.94257	5.76105	0	0	5.64695	5.55727
Hdac2_725_829	2.22942	2.44418	2.79448	3.2498	1.46181	1.40907	2.35001	2.81527	2.3393	2.51499	1.05999	1.15184	1.99892	2.41605	1.98154	1.95707	2.44953	2.42848	1.22295	1.18106	3.48789	3.25033	3.1088	3.96218			Hdac4_468_533	0.454956	0.490664	0.493412	0.74678	1.26735	0.99452	0.992305	0.872909	0.973572	0.702284	0.637104	0.596052	0.656698	0.653853	0.550976	0.487635	0.55363	0.657975	0.744	0.977899	0.580181	1.12959
Hdac3_1246_1318	5.31539	5.75038	8.69711	8.39925	1.29004	1.17784	5.3056	4.82227	4.14657	4.0723	1.49393	1.57938	4.10765	4.35739	4.1755	4.2878	4.85397	4.15108	1.35441	1.42605	6.49593	5.67429	5.67578	6.13142			Hdac6_4534_4582	5.31492	4.89168	4.67023	0	0	0	6.54277	5.16716	0	0	0	0	4.3333	5.53561	4.70065	0	7.51541	6.96697	0	0	0	0
Hdac4_468_533	0.226411	0.289526	0.474831	0.428659	0.0774933	0.13483	0.667255	0.610077	0.442065	0.410267	0.252811	0.183073	0.369093	0.215947	0.517276	0.541123	0.311254	0.317175	0.235561	0.151573	0.505632	0.39368	0.443856	0.69057			Hdac7_1340_1410	0.147461	0.137229	0.123134	0.0783546	0.0532738	0.0864339	0.0838595	0.112812	0.0689274	0.322671	0.240285	0.225584	0.0957006	0.114651	0.113642	0.113799	0.116159	0.0480612	0.0657532	0.0695746	0.0820783	0.0923728
Hdac5_5046_5126	6.50844	3.8942	5.95763	5.6906	3.3164	3.54179	3.12804	3.26122	5.56148	2.69609	4.17242	2.80364	5.69562	4.52414	3.62823	4.80459	4.54386	3.13868	4.60043	4.80989	2.70515	5.18984	2.94703	5.1033			Hdac7_1797_1845	0.122445	0.159635	0.174972	0.0507375	0.0675881	0.0642975	0.0700789	0.073207	0.0885151	0.295099	0.215593	0.261597	0.100448	0.10055	0.0741708	0.0921214	0.104438	0.0996264	0.0820052	0.0579416	0.0655275	0.101092
Hdac6_4534_4582	1.11845	0.76954	1.14774	1.41439	0.424984	0.454473	1.25847	1.2227	0.984628	1.00445	0.292539	0.280357	0.82302	0.760616	0.877229	0.786783	0.8547	0.627544	0.617669	0.622579	1.26973	1.0884	1.24655	1.29618			Hdac9_1009_1111	0.230156	0.245263	0.220894	0.552882	0.511608	0.464285	0.426428	0.371888	0.444484	0.264925	0.199075	0.192781	0.172692	0.287694	0.200622	0.226284	0.250948	0.236255	0.434698	0.406667	0.299456	0.440207
Hdac7_1340_1410	0.0907363	0.0645881	0.107027	0.192006	0.331292	0.250055	0.113914	0.0880358	0.0941612	0.0819364	0.189826	0.111294	0.126574	0.11345	0.0808421	0.0742985	0.163572	0.0822788	0.137065	0.148711	0.128098	0.116035	0.128547	0.14996			Hesx1_198_298	0.00237394	0.0033786	0.000923478	0.0061466	0.00435123	0.01015	0.0199231	0.0273171	0.0273775	0.000899804	0.000798437	0.000690798	0.00142532	0.00174808	0.00448481	0.025647	0.0179131	0.0218029	0.0107298	0.00574889	0.011893	0.0169816
Hdac7_1797_1845	0.0985962	0.094689	0.113945	0.154873	0.386377	0.400254	0.20965	0.162887	0.140206	0.0959798	0.337842	0.312822	0.17948	0.197186	0.16193	0.12992	0.134874	0.165133	0.228358	0.259037	0.109787	0.0985762	0.0885307	0.144683			Hesx1_429_491	0.0135051	0.0310553	0.0313823	0.0100612	0.006963	0.00937339	0.0416765	0.0568669	0.0383435	0.0099255	0.0122098	0.00516981	0.0149357	0.0154789	0.0198807	0.0143428	0.025587	0.0270444	0.0194011	0.0132341	0.0229279	0.0165572
Hdac9_1009_1111	0.0904453	0.0784847	0.107388	0.101794	0.0317282	0.0388101	0.0695339	0.0777006	0.0227111	0.0340847	0.0195299	0.0165086	0.0294101	0.0361392	0.0307765	0.0235311	0.051402	0.0818369	0.0340528	0.0696641	0.102802	0.0814863	0.138307	0.156388			Hoxa1_481_536	0.0111637	0.00370494	0.00809693	0.00224649	0.00726761	0.0028712	0.0149912	0.0167698	0.0216047	0.00112285	0.0027054	0.00089174	0.00536446	0.00815861	0.00861309	0.00530355	0.0185469	0.0131294	0.0137356	0.00145524	0.000347287	0.0151082
Hesx1_198_298	0.00249707	0.00302202	0.00402279	0.00308645	0.00397434	0.00465641	0.00257332	0.00218255	0.00243745	0.00275556	0.00313005	0.00551955	0.00485133	0.00242068	0.00480983	0.00354621	0.00323234	0.0049048	0.0117689	0.00806705	0.00173785	0.00163568	0.00185951	0.00230136			Hoxb1_199_255	0.00168197	0.000840654	0.000652525	0.00431017	0.00294	0.000172738	0.0119968	0.0135178	0.0148341	0.000752571	0.00172479	0.000509131	0.00180724	0.00488425	0.00257371	0.0115816	0.0167809	0.00635819	0.0113194	0.000399107	0.00340833	0.00797521
Hesx1_429_491	0.00355703	0.00391678	0.0046221	0.00367505	0.00500526	0.00736376	0.00383843	0.00959484	0.00261231	0.00407773	0.00433487	0.00370194	0.00637485	0.00437319	0.00589591	0.00610714	0.00478524	0.00475579	0.0162335	0.00818016	0.00336942	0.00434163	0.00577925	0.00448484			Htt_2625_2697	0.773325	0.810796	0.813983	2.07276	2.4293	1.70647	1.98911	1.83318	1.78364	1.45192	1.70982	1.13713	0.857996	0.912211	0.702209	1.2112	1.05124	1.14517	1.9113	1.43723	1.4639	2.20981
Hoxa1_481_536	0.00264581	0.00346518	0.00485459	0.0141621	0.00224065	0.0225509	0.00958221	0.00421628	0.00560099	0.00482337	0.02858	0.00877833	0.0186543	0.00647922	0.0103502	0.00326958	0.00241296	0.00569625	0.0111998	0.0151481	0.0150582	0.00829253	0.0104211	0.0108167			Htt_8463_8546	1.09113	1.28691	1.20851	1.96627	1.88651	1.7416	1.79837	1.26998	1.65153	1.69247	1.28623	1.11993	0.627517	0.921925	0.836883	0.981727	0.96027	0.936187	1.29596	1.35323	1.11478	1.66578
Hoxb1_199_255	0.000696099	0.00194464	0.00418421	0.00355197	0.011643	0.0036196	0.00238725	0.00280989	0.00174941	0.00271576	0.0040714	0.00366273	0.00270857	0.00318183	0.00481896	0.00241681	0.00348482	0.00346488	0.0114792	0.0113196	0.00308002	0.00171157	0.00162764	0.0022116			Htt_8895_8977	0.750234	0.864024	0.959665	1.59408	1.79162	1.50629	1.37554	1.20963	1.27067	1.34824	1.21674	0.842474	0.818864	0.911492	0.836551	0.806448	0.822906	0.739846	1.33885	1.5198	1.26356	1.65792
Htt_2625_2697	0.135803	0.156824	0.155846	0.171408	0.0942095	0.108377	0.164605	0.208652	0.128174	0.115717	0.0408211	0.0689807	0.169598	0.14973	0.1639	0.195521	0.170048	0.137413	0.145847	0.154836	0.13152	0.133587	0.159727	0.154456			Ier3_261_379	0.482583	0.573794	0.620677	0.647655	0.80093	0.65502	0.37099	0.388465	0.40081	0.368203	0.409324	0.38551	0.742685	0.675196	0.687533	0.655458	0.675444	0.647492	1.02385	1.39562	0.96423	0.391357
Htt_8463_8546	0.0958699	0.0900494	0.0950522	0.106738	0.0926602	0.0878841	0.142934	0.183671	0.0722997	0.0766611	0.0534281	0.0290252	0.118864	0.139496	0.13058	0.129222	0.0793866	0.064691	0.109323	0.0503736	0.1032	0.119109	0.102422	0.14799			Il6_79_209	0.00651389	0.00822123	0.00724108	0.00728302	0.0119108	0.0221041	0.0464491	0.0345924	0.035124	0.00587017	0.00586904	0.00358519	0.00842239	0.0110188	0.0198457	0.0480183	0.0319317	0.0310071	0.0176365	0.015147	0.0161829	0.023486
Htt_8895_8977	0.18685	0.115601	0.221992	0.160369	0.104796	0.108902	0.264336	0.236778	0.104954	0.0965869	0.0528953	0.0541232	0.166985	0.209706	0.194875	0.15313	0.192101	0.170936	0.165057	0.149935	0.150544	0.141704	0.170529	0.206314			Ing2_1268_1330	1.67936	2.09287	1.95887	4.29467	6.37544	4.13414	2.55609	3.17001	2.88497	2.89587	3.36272	3.07311	3.0153	3.85424	2.17302	6.13336	5.08384	4.39416	5.03071	6.06991	4.01251	3.04844
Ier3_261_379	0.466185	0.61997	0.513461	0.55049	0.196036	0.254963	1.00808	0.840415	0.517657	0.383292	0.407883	0.450676	0.450993	0.513707	0.18012	0.190879	0.45752	0.389651	0.241588	0.185486	0.321715	0.283814	0.35681	0.386964			Jarid2_2012_2083	0.374972	0.412407	0.352311	0.762702	0.75804	0.666692	0.696269	0.666969	0.652126	0.529647	0.474368	0.362059	0.346037	0.361678	0.394746	0.434146	0.282134	0.290015	0.464137	0.413027	0.406316	0.739001
Il6_79_209	0.00345779	0.0105355	0.0175731	0.00987397	0.0186728	0.0100299	0.00572728	0.00560919	0.00910118	0.0183768	0.0321949	0.0121668	0.0144125	0.00662744	0.015911	0.00551954	0.00517316	0.00990358	0.0140153	0.00956934	0.00693741	0.0126439	0.00545994	0.00419617			Jarid2_6544_6604	1.05638	0.929665	1.03472	2.3503	2.80236	2.4613	1.5975	1.93735	1.72089	0.871742	1.07636	0.942732	0.934774	1.52909	1.28527	1.38409	1.61248	1.36271	2.1759	2.30957	2.52469	1.50193
Ing2_1268_1330	2.694	2.66612	3.51567	4.0542	2.68603	3.76554	2.16763	2.63694	3.50606	3.92787	7.59072	8.48333	2.16567	2.7644	2.49488	2.79168	2.5039	3.2961	2.38495	2.72097	3.93574	3.33052	3.66703	2.99829			Jmjd4_3515_3568	0.583221	0.477449	0.504796	1.45869	1.35641	1.17205	1.25454	0.854445	0.987018	0.943185	0.853378	0.704566	0.705495	0.707463	0.606178	0.830885	0.741688	0.809455	1.33214	1.40453	1.10038	1.8024
Jarid2_2012_2083	0.125879	0.156674	0.196294	0.20148	0.0423636	0.0787837	0.161359	0.180181	0.0785932	0.10053	0.0366538	0.0715474	0.0960452	0.11283	0.110688	0.0659268	0.187885	0.162129	0.0587831	0.085733	0.192901	0.21433	0.156739	0.18767			Jmjd6_471_532	2.10809	2.19872	2.03753	6.11923	4.47604	4.64235	2.79361	2.16889	2.70181	1.99862	1.40776	1.19551	1.49177	1.66301	1.77039	2.32238	1.63105	2.48681	5.27186	4.92432	4.59771	3.35327
Jarid2_6544_6604	0.75725	0.7821	1.16394	1.15171	0.551124	0.668736	0.815196	0.703813	0.662303	0.587276	0.347422	0.330878	0.626911	0.63769	0.785444	0.717573	0.93936	0.823026	0.334449	0.260631	1.04568	1.0494	1.05756	1.01751			Jmjd6_749_803	1.75574	2.35519	1.86788	4.18013	0	4.12435	2.26804	2.70728	2.67466	1.93129	1.60443	1.24353	1.75436	1.9845	1.4987	2.35626	2.29778	2.07376	4.07541	4.76699	3.79992	3.33365
Jmjd4_3515_3568	0.628544	0.603156	0.561074	0.676125	0.205042	0.229593	0.82153	0.728781	0.526272	0.514297	0.0893352	0.126981	0.682046	0.846984	0.532219	0.859597	0.620719	0.532797	0.165332	0.186027	0.667695	0.655821	0.649425	0.898127			Jmjd7_1256_1312	4.74709	4.62319	4.72449	0	0	0	4.58969	4.1832	0	0	0	0	5.03468	3.99339	4.14649	0	6.26201	0	0	0	0	0
Jmjd6_471_532	0.817128	0.987906	0.865854	1.35788	0.364689	0.493102	1.11906	1.4021	0.754319	0.78961	0.385063	0.323005	0.932411	1.19775	0.633352	0.762856	0.901682	0.983649	0.405536	0.329534	0.979281	1.0194	0.992971	1.21703			Kansl1_1549_1614	1.55325	1.42945	1.4618	3.09892	2.91779	2.59632	2.72196	2.45009	2.48697	2.59686	2.25329	2.10359	1.53008	1.87904	1.79429	1.90553	1.73827	1.6007	2.48193	2.45132	1.91642	2.87794
Jmjd6_749_803	1.22466	1.00542	1.44886	1.26175	0.84843	0.987567	1.42342	1.18984	0.847478	0.633874	0.611134	0.7486	1.26909	1.27457	0.730329	0.637509	1.03349	1.06074	0.949254	0.957456	1.34804	0.879471	1.04857	1.26443			Kansl1_3177_3232	0.0298318	0	0.0612675	0.133354	0	0	0.06822	0	0.0483295	0.0829612	0.112873	0.0375916	0	0.0910669	0.0452634	0.0311404	0	0.140091	0.0649537	0	0	0.0493844
Jmjd7_1256_1312	2.46878	3.19082	3.15966	3.34843	3.95287	4.09578	4.24319	3.57939	2.53508	2.83872	3.96059	3.43028	3.60428	3.3671	3.14609	3.99024	3.26608	3.38524	9.24933	6.54339	2.7111	2.08521	3.53374	3.20223			Kansl1_933_1015	1.10088	1.21517	1.36103	2.11526	2.85919	2.56004	2.00713	2.77449	2.41826	1.49914	2.10871	1.70637	1.19462	1.73433	1.65543	1.12772	1.4075	1.39037	1.72802	2.78288	2.06332	1.85342
Jmjd8_1542_1589	9.70246	10.0992	0	0	2.24243	2.66054	0	11.4301	7.29155	6.92092	1.78579	1.75839	7.5109	7.97443	7.017	7.96556	8.50222	7.20616	2.11659	2.18609	0	8.36923	0	9.84073			Kat2a_504_555	1.07781	0.74179	0.70531	1.76336	1.81694	1.7693	1.78347	1.40186	2.02967	2.31068	1.58618	1.3696	1.02683	0.79841	1.29051	1.11221	0.950918	0.91083	1.58978	1.3286	1.63714	1.41431
Kansl1_1549_1614	0.651271	0.53774	0.812521	0.966175	0.365138	0.468454	0.930303	0.96048	0.660778	0.656027	0.362732	0.39704	0.729273	0.738779	0.457953	0.550092	0.782817	0.77851	0.572268	0.601329	0.873043	0.843285	0.963343	0.864043			Kat2b_2461_2517	0.743708	0.959021	0.875981	1.31702	1.72995	1.37002	0.950736	0.8971	1.00951	0.473094	0.592026	0.589377	0.75587	0.82271	0.902482	1.16325	1.16693	1.2303	1.34677	1.36939	1.33931	1.15891
Kansl1_933_1015	0.702099	0.663169	1.0717	1.14501	0.706055	0.695189	1.34824	1.42408	1.02513	1.15151	0.772715	0.61899	1.12241	1.22344	0.974836	0.9185	0.832782	0.858073	0.511876	0.339583	1.17283	1.02768	1.28199	1.51468			Kat5_248_317	0.945517	0.998798	0.887982	1.72149	1.54232	1.48246	1.00494	0.982222	0.860994	0.957838	0.965059	0.692498	0.651548	0.718372	0.704591	0.949123	0.752449	0.847619	1.31318	1.49455	1.33986	1.22678
Kat2a_504_555	0.185737	0.269295	0.505091	0.38345	0.18208	0.301202	0.576187	0.49322	0.365996	0.29282	0.17722	0.200779	0.27894	0.363967	0.321531	0.274539	0.267833	0.224402	0.351861	0.202763	0.552526	0.49621	0.504005	0.46226			Kat5_512_558	4.6955	4.35309	5.70247	0	0	0	6.08438	3.91354	5.27919	0	3.54358	3.68805	4.89664	3.49333	4.10818	6.23371	4.96673	5.37526	0	0	0	0
Kat2b_2461_2517	3.00412	2.77138	4.19006	4.2653	1.37256	1.51185	2.44756	3.05528	3.73464	3.96289	1.87875	2.00027	3.22073	3.03603	2.5568	3.07378	3.15435	3.17626	0.965318	1.16065	4.88879	5.23315	5.36182	5.09399			Kat6a_1987_2059	0.322637	0.338969	0.298898	0.852224	0.793263	0.758521	0.6711	0.571753	0.723652	0.544372	0.397598	0.398967	0.399144	0.447712	0.442564	0.499799	0.446207	0.395919	0.693497	0.869887	0.656594	0.827955
Kat5_248_317	0.336509	0.257864	0.402242	0.490303	0.123308	0.126049	0.357754	0.334153	0.264835	0.284601	0.174135	0.156582	0.273356	0.269997	0.245781	0.245466	0.311598	0.260893	0.131214	0.153872	0.324347	0.306984	0.443539	0.355316			Kat6b_4598_4656	0.867222	0.708601	0.773688	1.26251	2.93094	1.77675	1.19133	1.64645	1.51668	1.7116	2.04708	1.59506	0.718718	0.740575	0	0.897004	1.16138	1.23523	1.27915	1.6353	0.814484	1.21623
Kat5_512_558	1.56928	1.36299	1.89966	2.42227	0.54798	0.467354	1.63208	1.6731	1.02479	0.879166	1.198	1.07909	1.23619	1.19337	1.06823	1.01984	1.35326	1.70609	0.573436	0.533732	1.70109	1.54791	1.63406	2.32759			Kat7_1078_1141	0.667869	0.714966	0.642452	2.2274	2.13446	1.88751	1.34999	1.25446	1.27132	0.954854	0.865703	0.833009	0.996497	0.923365	0.96313	1.22124	1.08231	0.803407	2.21127	1.96102	2.12232	1.51316
Kat6a_1987_2059	0.431538	0.428633	0.617663	0.609594	0.547558	0.512462	0.638884	0.607942	0.595565	0.503137	0.390782	0.386108	0.658518	0.659886	0.536288	0.61633	0.435021	0.475222	0.518955	0.458755	0.722936	0.547279	0.536192	0.560983			Kdm1a_1021_1229	0.526295	0.587079	0.476294	0.421272	0.636054	0.481436	0.544738	0.521493	0.510453	0.482432	0.584253	0.404447	0.45856	0.594188	0.557917	0.701936	0.70837	0.583165	0.63897	0.593385	0.476562	0.574129
Kat6b_4598_4656	0.238693	0.265443	0.261885	0.205593	0.112923	0.108645	0.354645	0.272905	0.147522	0.209702	0.104205	0.138212	0.253617	0.262703	0.259612	0.249244	0.205063	0.152273	0.236369	0.245462	0.311759	0.145785	0.260323	0.228516			Kdm1a_1300_1383	4.76522	5.65119	4.96525	0	0	0	0	0	0	3.20559	2.79154	1.96104	7.51683	0	4.13848	0	0	5.85461	0	0	0	0
Kat7_1078_1141	0.147052	0.173744	0.220602	0.371535	0.0915491	0.113904	0.200463	0.214252	0.12972	0.207068	0.12143	0.148702	0.195529	0.200881	0.110554	0.149569	0.189826	0.195479	0.0917649	0.136913	0.322454	0.351625	0.34091	0.41875			Kdm1b_1873_1924	0.097331	0.106499	0.108069	0.185209	0.279605	0.213513	0.147971	0.133193	0.136364	0.0793061	0.0892123	0.109563	0.0740243	0.0962282	0.104357	0.123526	0.115018	0.107376	0.179246	0.200094	0.15809	0.183947
Kat7_956_1036	0.348641	0.551975	0.899755	0.671015	0.315862	0.211312	0.47801	0.626918	0.229859	0.705035	0.514387	0.185723	0.26374	0.498162	0.315237	0.484202	0.706999	0.505415	0.561412	0.567554	0.6915	0.631735	0.913149	0.801215			Kdm1b_2334_2379	0.160469	0.131985	0.125498	0.296203	0.347142	0.24157	0.267556	0.26411	0.228091	0.145742	0.146825	0.131199	0.100608	0.12221	0.121117	0.276714	0.198722	0.185399	0.265558	0.320366	0.231063	0.316251
Kdm1a_1021_1229	0.467096	0.498861	0.51063	0.599917	0.36628	0.423808	0.381116	0.469657	0.358304	0.450083	0.46427	0.379282	0.552944	0.57685	0.485947	0.512343	0.493279	0.433198	0.464813	0.507727	0.507311	0.452068	0.487099	0.615063			Kdm2a_3786_3865	1.82615	1.99859	1.54036	5.1015	4.78432	3.95525	2.7578	2.3592	2.50062	2.57536	2.07427	1.54528	1.34695	1.79123	1.45145	1.51543	1.45026	1.2721	3.12901	3.32933	2.79543	3.31842
Kdm1a_1300_1383	1.03555	1.27452	1.17048	1.30133	0.223011	0.279708	1.11396	0.813522	0.713909	1.01069	0.431555	0.42457	1.01745	1.0683	0.840312	0.476466	1.2518	0.995027	0.256427	0.18404	1.21782	1.30702	1.43414	1.16644			Kdm2b_4033_4108	0.525837	0.505838	0.552803	1.4972	1.38567	1.35869	1.05837	0.726442	0.917299	0.770346	0.635133	0.679653	0.638318	0.811134	0.850755	1.27404	0.993714	1.28179	1.43823	1.50282	1.38039	1.08838
Kdm1b_1873_1924	0.169709	0.152328	0.131846	0.204091	0.134204	0.148043	0.251876	0.195449	0.146103	0.131545	0.126058	0.094889	0.22263	0.195547	0.142588	0.104375	0.170101	0.163571	0.155806	0.170323	0.22156	0.157397	0.21944	0.332639			Kdm3a_114_170	1.27999	2.03041	2.93812	2.2623	2.95192	0	1.88721	2.39763	3.7639	1.80975	3.17939	3.75466	1.0036	2.08502	2.25626	1.24542	1.375	1.72661	2.18751	3.17741	3.04695	1.91579
Kdm1b_2334_2379	0.2574	0.219711	0.283891	0.312875	0.0878511	0.0970071	0.408639	0.349838	0.281656	0.273415	0.0896168	0.0762654	0.288363	0.245179	0.199122	0.228325	0.242324	0.255723	0.149884	0.145882	0.345596	0.343252	0.36554	0.45958			Kdm3a_3455_3515	1.78614	1.86526	1.53069	5.12871	4.43805	3.66293	2.83326	2.80388	2.91552	1.98831	1.70419	1.30782	3.19405	3.62174	3.0727	0	5.5146	5.4519	0	0	0	3.74067
Kdm2a_3786_3865	2.27495	1.71762	2.23109	2.5711	2.64838	2.5998	3.27832	2.75109	2.24982	2.26659	1.85293	1.60991	2.74634	3.02068	2.40647	2.63182	1.70376	1.67511	1.22826	1.33659	2.28083	2.0627	2.26372	2.97288			Kdm3b_1965_2043	0.60185	0.780895	0.701557	1.3788	1.49325	1.24681	1.43772	1.16196	1.1111	1.45134	1.27554	1.06109	0.773585	0.837157	1.05732	0.901562	0.708272	0.75846	1.13171	1.27565	0.882783	1.67526
Kdm2b_4033_4108	0.248606	0.223252	0.384165	0.330586	0.112147	0.120083	0.193432	0.197291	0.18813	0.146886	0.0946639	0.0777427	0.228251	0.198231	0.195159	0.213143	0.188973	0.171974	0.110189	0.0686102	0.238475	0.175388	0.223581	0.266634			Kdm3b_5651_5699	1.66499	1.72297	1.54254	4.36418	4.97388	3.92377	2.97819	2.87905	2.19365	2.34662	1.7617	1.81478	1.78788	1.79609	1.80865	3.30321	2.7087	2.64537	3.87139	4.17636	3.28017	3.27915
Kdm3a_114_170	0.105888	0.0784393	0.124258	0.146981	0.101643	0.292497	0.456926	0.270259	0.082494	0.105784	0.294645	0.124612	0.160643	0.173803	0.156635	0.0597124	0.114259	0.131172	0.277112	0.0840793	0.249489	0.109008	0.204168	0.156295			Kdm4a_1032_1083	0.369791	0.39822	0.308259	0.604743	0.614116	0.591067	0.709645	0.586033	0.601802	0.6037	0.677169	0.590891	0.426194	0.489097	0.507836	0.427986	0.358303	0.397348	0.662873	0.640776	0.462467	0.671501
Kdm3a_3455_3515	0.248453	0.217029	0.233755	0.34147	0.105761	0.0756357	0.30614	0.290665	0.290458	0.224108	0.180532	0.188397	0.248221	0.223898	0.19211	0.157483	0.218276	0.2192	0.127073	0.0754859	0.405537	0.391314	0.316379	0.386966			Kdm4b_968_1048	1.25861	1.10486	1.24953	2.7011	2.55182	2.35643	2.30436	2.07234	2.29519	1.99541	1.75798	1.71648	1.1998	1.28341	1.38986	1.57501	1.27693	1.37708	1.98121	2.01879	1.83684	2.3669
Kdm3b_1965_2043	0.761775	0.6276	0.703372	0.876634	0.869862	0.985776	0.831407	0.935186	0.655069	0.674438	0.87474	0.924788	0.799047	0.852623	0.579828	0.689608	0.710803	0.493991	0.404017	0.534722	0.815687	0.792233	0.90619	1.15943			Kdm4c_3207_3266	3.7276	3.9372	3.06536	0	0	0	0	0	0	4.84424	5.52595	2.96113	5.61521	0	6.40425	0	0	0	0	0	0	0
Kdm3b_5651_5699	1.26256	1.36596	1.15421	1.60209	1.23643	1.54423	1.33585	1.71787	1.58339	1.67732	1.63364	1.94258	1.52456	1.51002	1.06921	1.29212	1.09844	1.38841	0.435241	0.49229	2.10725	1.94578	2.56817	2.72512			Kdm4d_1141_1200	0.0634644	0.0805267	0.0320058	0.0489783	0.0757584	0.0896164	0.073998	0.0961077	0.102672	0.0718896	0.130349	0.0626618	0.0799036	0.0547214	0.0629101	0.112568	0.0478405	0.0761912	0.0304523	0.0967287	0.0732735	0.0833781
Kdm4a_1032_1083	0.0781017	0.096572	0.116117	0.147944	0.0464253	0.0575734	0.137676	0.119988	0.0597179	0.0648222	0.0959036	0.0600366	0.0642161	0.0942606	0.0725613	0.0699287	0.105479	0.0964624	0.0443134	0.0912281	0.116676	0.122516	0.111559	0.118574			Kdm4d_848_903	0.0467063	0.045845	0.0451262	0.101572	0.131074	0.0774945	0.131822	0.121079	0.0822143	0.0774874	0.0695412	0.072678	0.0166311	0.0719091	0.0471973	0.103673	0.0705618	0.0710535	0.0958	0.0867077	0.0948394	0.0820632
Kdm4b_968_1048	0.284469	0.296388	0.351626	0.485815	0.193406	0.175392	0.37895	0.447419	0.223847	0.253755	0.142483	0.23164	0.346234	0.314191	0.299677	0.313933	0.342516	0.212737	0.2631	0.278254	0.350415	0.298922	0.402071	0.431925			Kdm5a_8028_8085	3.56858	3.49014	3.46573	0	0	0	4.3835	5.12072	4.12778	2.4025	3.17848	3.38084	4.38265	4.71072	4.80667	6.18121	0	0	0	0	0	5.19659
Kdm4c_3207_3266	1.33837	1.26138	1.76639	1.83098	0.277774	0.353681	1.22448	1.30474	1.37279	1.44647	0.616244	0.416736	1.28856	1.03219	1.07708	0.966007	1.24023	1.20442	0.462189	0.239873	2.69244	2.35502	2.54813	2.2099			Kdm5c_4964_5024	5.77814	4.87603	4.5213	0	0	0	4.65741	0	4.57023	3.56452	4.49895	4.23002	2.63949	3.89965	3.10663	3.84384	3.1531	3.10829	4.9848	0	0	0
Kdm4d_1141_1200	0.0048277	0.00774742	0.00332049	0.0193613	0.00699809	0.00282184	0.00155515	0.00564585	0.0047631	0.00150781	0.00836736	0.00412011	0.00380418	0.00799299	0.0134583	0.00377396	0.00695835	0.00105016	0.0108909	0.0151687	0.00418473	0.0045385	0.0108449	0.00158096			Kdm6a_2798_2856	1.72261	1.86601	1.57232	0	5.59656	3.71891	4.26231	3.49689	3.81436	4.20248	4.02604	3.30445	2.41079	3.005	2.84364	3.29311	2.61024	2.58635	5.44679	6.2653	5.39374	3.35155
Kdm4d_848_903	0.00417356	0.00394133	0.00736774	0.00171263	0.00663482	0.00211532	0.00743142	0.00564594	0.0072391	0.00722308	0.00617981	0.0066923	0.00584388	0.00233676	0.00661383	0.00590025	0.00693738	0.00758833	0.0172005	0.01272	0.00344782	0.00458312	0.00312408	0.00591241			Kdm6b_1230_1283	0.939412	0.770425	0.748828	1.13913	1.14819	0.83201	1.07523	0.744919	0.877887	0.933463	0.947784	0.730523	0.497799	0.473151	0.428776	0.521489	0.403055	0.38199	0.481296	0.41198	0.336813	0.798365
Kdm5a_4764_4832	1.86757	1.557	1.82367	1.84888	0.628343	0.695645	1.93712	2.13719	1.22882	1.21641	0.484651	0.544295	1.36839	1.34013	1.37527	1.42755	1.46335	1.51393	0.55268	0.734316	1.71458	1.68358	1.77393	1.94503			Kdm6b_163_239	0.272711	0.347274	0.300895	0.522002	0.667972	0.6374	0.620089	0.492689	0.46931	0.417935	0.345908	0.400409	0.290913	0.369729	0.315766	0.333119	0.300888	0.216833	0.276054	0.283177	0.207764	0.390255
Kdm5a_8028_8085	2.84224	2.79843	3.41731	3.69648	3.89648	3.92062	3.36146	2.46663	3.15955	2.59675	4.54908	4.31186	2.77054	2.67706	3.20087	3.17647	2.69934	2.66596	3.54368	3.81614	3.07866	3.65586	2.59574	3.28132			Kdm8_1156_1208	0.137138	0.0945907	0.0937436	0.208357	0.227207	0.207082	0.10366	0.129075	0.149699	0.126254	0.0880623	0.113802	0.079166	0.100425	0.0836561	0.12036	0.146313	0.0957502	0.22793	0.224279	0.157713	0.174585
Kdm5b_4721_4779	1.51636	1.23177	1.33152	1.45593	2.13054	1.83727	1.55138	1.57207	1.62028	1.2853	1.26603	1.21665	1.68462	1.82209	2.13341	1.7808	1.2437	1.2123	1.37707	1.30289	1.64065	1.56302	1.72062	1.77231			Kdm8_1281_1357	0.065439	0.0671042	0.0528871	0.116907	0.125599	0.0847874	0.0643011	0.0518646	0.0514472	0.0660577	0.0619809	0.0371258	0.0378837	0.0210739	0.0599074	0.0997815	0.0897502	0.0865739	0.145214	0.127069	0.0883875	0.107431
Kdm5c_4964_5024	3.44517	2.84864	3.24111	3.3	3.28092	3.95795	4.9939	5.55934	2.97142	3.6372	2.62404	2.48922	3.64771	4.84486	3.18583	4.21	2.53433	2.597	2.4408	2.86568	3.64121	3.22492	3.625	5.0653			Lin28a_3136_3198	0.542376	0.438894	0.533024	0.431175	0.369299	0.343693	0.416707	0.405684	0.337449	0.426813	0.463472	0.335355	0.53156	0.536978	0.579251	0.576004	0.483485	0.475866	0.433277	0.419785	0.370304	0.448867
Kdm6a_2798_2856	2.97363	2.51206	2.90596	3.09554	3.26436	4.11141	4.83424	5.24859	3.5104	4.05916	4.07521	4.52152	4.19053	3.80632	3.16711	3.33899	2.8499	2.96045	1.72552	1.71293	4.74983	3.98692	4.82019	4.74179			Lmx1b_575_637	0.00191629	0.0191207	0.00954174	0.0118754	0.0045902	0.00092686	0.0120539	0.0140961	0.00526757	0.00691954	0.00786121	0.00396267	0.0113659	0.00251168	0.00142777	0.00225821	0.0186195	0.0118579	0.00960788	0.00393958	0.00677034	0.0150524
Kdm6b_1230_1283	0.705578	0.696303	1.00325	1.09828	0.664198	0.649312	0.655053	0.801323	0.515342	0.56816	0.284826	0.335647	0.795855	0.781847	0.746145	0.631666	0.621333	0.758502	0.5444	0.658372	0.838873	0.818879	0.849556	0.915447			Mad1l1_2151_2198	0.473437	0.522998	0.544058	1.05407	1.05373	0.870007	0.677813	0.613652	0.641781	0.978372	0.895532	0.85362	0.433143	0.445045	0.375495	0.724099	0.724183	0.682138	1.01429	0.886288	0.777515	0.909275
Kdm6b_163_239	0.991677	1.10631	1.36936	1.43696	1.15023	1.42473	1.12375	1.07018	0.892093	0.986815	0.732351	0.74549	1.3351	1.35722	1.21886	1.23076	1.14864	1.07115	0.894928	1.12005	1.12603	1.087	1.18577	1.37015			Mecp2_862_918	1.97849	3.10686	1.82899	4.94625	0	3.93485	3.49299	3.9432	3.2944	3.13638	3.47425	2.5776	2.08736	2.16423	2.30392	2.72042	2.22145	1.70158	3.60061	4.26712	3.84702	3.69475
Kdm8_1156_1208	0.12101	0.160003	0.155099	0.151615	0.045072	0.0701642	0.140189	0.116102	0.0938549	0.112709	0.0396605	0.0270273	0.230582	0.128869	0.0995863	0.113153	0.200178	0.189163	0.112089	0.144212	0.141916	0.149554	0.148095	0.167365			Meis1_1417_1487	0.497811	0.371055	0.329054	1.18429	1.11607	0.653215	0.641386	0.718518	0.584602	0.698953	0.570917	0.504624	0.53301	0.532241	0.322063	0.783664	0.705157	0.646924	0.901923	1.15351	0.888516	1.12073
Kdm8_1281_1357	0.0811056	0.0698746	0.107304	0.122329	0.0351762	0.0525194	0.114293	0.0920317	0.0528113	0.0476773	0.0287782	0.0264054	0.12777	0.0875207	0.0792669	0.058743	0.0767507	0.053692	0.0696733	0.0429757	0.111908	0.0718487	0.0925867	0.0913021			Meis1_5459_5538	0.338897	0.337783	0.34935	0.98874	0.860992	0.782386	0.44842	0.429834	0.451101	0.577194	0.511337	0.448267	0.416835	0.370805	0.36745	0.602488	0.604345	0.60875	0.756657	0.949402	0.785052	0.762694
Lin28a_3136_3198	1.19114	0.944516	1.04462	1.19808	1.49667	1.53076	0.777312	0.825882	0.949482	1.09295	1.23715	1.2994	1.17689	1.15447	1.22356	1.36655	1.11734	1.01466	2.97701	3.2326	0.844241	0.785169	0.721259	0.828196			Meox2_403_481	0.0227602	0.0148718	0.0180691	0.0506621	0.0342012	0.045047	0.0345321	0.05553	0.0626383	0.0654844	0.0603048	0.0514479	0.0402341	0.0294696	0.0328032	0.0429054	0.0392189	0.0182994	0.0795822	0.0626669	0.0576449	0.0330901
Lmx1b_575_637	0.00453974	0.00434941	0.00694688	0.00527709	0.0168172	0.0096759	0.0137245	0.00505247	0.00939327	0.0165044	0.0133189	0.00602311	0.00781427	0.022259	0.00477565	0.0101813	0.0118206	0.0116091	0.0193744	0.0246554	0.00962489	0.00506018	0.00765042	0.00282071			Mtf2_253_297	0.574678	0.603648	0.534237	2.4798	2.32196	2.65382	1.32122	1.31049	1.36039	1.43539	1.40233	1.22407	0.628328	0.766873	0.946227	0.993684	0.864833	1.13896	1.86029	2.10299	1.84791	1.40064
Mad1l1_2151_2198	0.380581	0.380678	0.493641	0.516023	0.320423	0.380837	0.396107	0.357561	0.382044	0.375325	0.280295	0.353968	0.367042	0.370746	0.515655	0.478669	0.31544	0.280937	0.263664	0.359122	0.372534	0.367972	0.376754	0.350506			Mtf2_856_952	2.35355	0	2.83121	0	0	0	0	4.14057	4.67701	5.81309	4.56365	4.40989	3.04183	3.08745	3.42266	4.77414	4.52549	3.94112	0	0	5.59045	5.16891
Mbd3_893_950	0	0	0	0	3.84492	4.48649	0	0	0	0	5.12046	4.98528	0	0	0	11.5811	0	0	3.70719	3.86115	0	0	0	0			Ncor2_3277_3349	0.4949	0.566985	0.569082	0.555032	0.564061	0.525379	0.567629	0.661334	0.49843	0.958043	0.855068	0.598185	0.397652	0.417472	0.413902	0.287785	0.253574	0.281302	0.361685	0.330447	0.313011	0.681555
Mecp2_862_918	0.545394	0.655443	0.955054	1.01213	0.185602	0.221798	0.933105	0.818343	0.518211	0.484396	0.474786	0.403232	0.565379	0.678851	0.392911	0.409253	0.777169	0.777834	0.452273	0.534505	0.718397	0.571972	0.834599	1.04322			Ncor2_8008_8083	1.21971	1.35356	1.26768	2.43258	2.29488	2.21675	1.54888	1.33432	1.53036	1.6275	1.42753	1.52603	0	1.02349	1.23832	1.26268	1.06888	0.922382	1.461	1.25341	1.7282	2.5488
Meis1_1417_1487	0.11048	0.131886	0.0739189	0.0973263	0.031351	0.0324388	0.117539	0.108832	0.0983426	0.101158	0.109806	0.0850748	0.0820541	0.0830373	0.0842801	0.115974	0.14583	0.0653342	0.0304604	0.0315228	0.243351	0.192392	0.150928	0.264475			Neurog1_1269_1316	0.0125958	0.0109672	0.00859105	0.0149511	0.0324427	0.0209871	0.0291337	0.0240134	0.0259514	0.0187663	0.0114039	0.0122553	0.0497754	0.0645755	0.089287	0.0472782	0.0314913	0.0421517	0.0465023	0.108982	0.0559779	0.0282467
Meis1_5459_5538	0.213196	0.178205	0.157489	0.140575	0.156981	0.150172	0.170331	0.198113	0.184366	0.193914	0.125566	0.14057	0.134849	0.156576	0.146793	0.206744	0.212439	0.206111	0.223807	0.167695	0.442871	0.429992	0.33754	0.407967			Nsd1_336_396	2.13049	2.57527	2.6366	6.94271	0	0	0	4.78798	0	5.79086	4.50704	5.04515	3.24386	3.2151	2.55633	3.21573	3.14175	2.52563	5.64714	6.21201	5.05116	6.16545
Meox2_403_481	0.86344	0.790175	0.898655	0.956464	1.35951	1.38868	1.00253	0.998194	0.700173	0.783797	0.488409	0.459004	1.22836	1.14297	0.849341	0.812445	0.88624	0.842946	0.491271	0.44817	0.775799	0.625188	0.628507	0.927728			Nsd1_7035_7112	1.90841	1.80614	1.84133	4.28919	4.8499	3.77126	3.39479	3.3586	3.24934	3.14973	2.92968	2.75086	2.17781	2.10248	1.84549	2.41977	1.73961	1.96294	3.34669	3.90695	3.54283	3.48768
Mtf2_253_297	0.089791	0.0847205	0.164242	0.141416	0.0699134	0.0837604	0.12264	0.11531	0.103753	0.0901877	0.0551756	0.0403306	0.130137	0.135569	0.0908903	0.0993535	0.146796	0.0944329	0.0784425	0.0205162	0.189044	0.117345	0.173232	0.138669			Onecut1_1235_1300	0.0157298	0.0426182	0.00898587	0.020475	0.0241457	0.0250253	0.0337273	0.0352273	0.0379091	0.0281059	0.065552	0.0382312	0.0195292	0.0138179	0.0156383	0.0285107	0.0531668	0.0325041	0.0488961	0.0586137	0.0372099	0.010212
Mtf2_856_952	1.04986	0.891362	1.15968	0.877632	0.448979	0.333389	0.865897	0.853597	0.86332	0.820018	0.250806	0.348792	0.700936	0.797958	0.696305	0.881375	0.569715	0.638063	0.249044	0.0718159	1.03573	0.873981	1.02245	1.02258			Onecut1_1545_1612	0.0199375	0.0164246	0.0187662	0.00808203	0.0435247	0.0437211	0.0788272	0.0769566	0.0726798	0.0459947	0.0259286	0.0336386	0.0752068	0.0428339	0.0229573	0.0530013	0.0244894	0.0456187	0.0626221	0.0527708	0.0306366	0.0406204
Ncor2_3277_3349	0.194484	0.171453	0.396371	0.482903	0.092935	0.0924235	0.246888	0.219879	0.229195	0.163023	0.0889894	0.0883819	0.179919	0.165993	0.154998	0.167965	0.24851	0.178009	0.116128	0.134845	0.476636	0.384694	0.320798	0.320136			Otx1_3716_3762	0.0294726	0.0252607	0.0326287	0.0178825	0.0450487	0.0378227	0.041339	0.0438739	0.0415083	0.0509505	0.0314164	0.0282294	0.0216819	0.0462258	0.0306453	0.0375834	0.033253	0.0311924	0.0196072	0.0481502	0.0465513	0.070075
Ncor2_8008_8083	1.01944	0.996989	1.30894	1.24911	0.696462	0.762723	1.00982	1.04493	1.19086	0.771598	0.551604	0.488329	0.726696	0.96787	0.941089	1.12195	0.917222	1.16432	1.34953	1.55439	1.23218	1.5007	0.95705	1.86484			Otx2_738_815	0	0	0	0.000118786	0	0	0.000131568	0	0	0.00023587	0.00021656	0	0	0	0	0.000220903	0	0	0	0	0	0
Neurog1_1269_1316	0.00486116	0.00412677	0.00798523	0.0054981	0.00465825	0.00588585	0.00637445	0.00556153	0.00342207	0.00441159	0.00770371	0.00853058	0.00802347	0.00466567	0.0105796	0.00429939	0.00439332	0.00888381	0.0235585	0.0123712	0.00297871	0.00281178	0.00428267	0.00155921			Pax7_792_847	0.00154346	0	0	0.000842	0.0050088	0.00436256	0.00587274	0.00384229	0.00949294	0.00412632	0	0.00100837	0.00684138	0.00537859	0.000814048	0.00461391	0.0270747	0.0079005	0.00230131	0.0110947	0.00257546	0.00825726
Nsd1_336_396	0.717457	0.749876	0.744497	0.734364	0.496947	0.448337	0.885909	0.892778	0.442446	0.54003	0.376395	0.303754	0.720998	0.708701	0.417139	0.50119	0.762533	0.734918	0.209735	0.265366	0.689763	0.640869	0.745046	0.641899			Pcgf2_1227_1281	2.50235	2.77153	3.01087	3.73723	3.12294	3.42242	2.91201	2.95896	2.44112	4.99936	4.37356	4.15187	2.70524	2.3042	2.60675	3.10715	2.5785	2.64606	2.60556	3.1278	2.34902	2.61593
Nsd1_7035_7112	0.733817	0.685303	0.941539	1.02668	0.690507	0.713744	1.07914	1.18219	0.516142	0.698562	0.408444	0.463531	0.821648	0.790113	0.832488	0.746656	0.68104	0.736928	0.546242	0.724513	0.639214	0.548612	0.671536	0.759203			Pcgf3_404_461	0.718829	0.703551	0.709997	3.26416	3.22863	2.69256	1.69513	1.71249	1.47707	1.56734	1.16729	0.898364	0.925174	0.952235	1.03786	1.2287	1.00642	0.910581	1.80256	2.58866	1.62834	2.06922
Ogt_2690_2762	3.75163	2.89523	4.60341	4.37676	1.88835	1.81745	3.86448	4.03378	4.44577	4.14649	1.95844	1.89102	4.01644	4.46516	3.30804	3.5642	3.85036	3.89566	1.7054	1.22168	6.48903	5.94612	5.70778	6.36736			Pcgf3_873_934	0.894835	1.18937	0.850664	2.26663	2.57463	1.99364	1.77715	1.48414	1.66766	1.23157	1.10059	1.09953	1.30669	1.32743	1.26077	1.4586	1.33412	1.21029	2.20818	1.95489	1.78098	2.18302
Ogt_766_846	3.10406	2.84429	3.42307	3.929	2.81885	2.68496	4.10847	3.49469	4.35317	4.85041	3.09224	3.19247	5.67701	5.06202	3.79397	3.66935	3.53907	3.80484	1.16214	1.64891	5.21846	5.03217	5.21695	7.2922			Pcgf5_1100_1161	0.773798	1.02476	0.854174	3.03667	3.13252	2.38701	1.6812	1.57688	1.57533	1.14131	1.06865	0.970679	1.80366	1.48523	1.49808	2.04187	1.92748	2.13677	2.8235	3.93708	3.05421	2.34774
Onecut1_1235_1300	0.00142877	0.00118237	0.00209103	0.00127328	0.00144265	0.00163103	0.00133872	0.000448164	0.00119546	0.00129818	0.000728986	0.00132948	0.00715426	0.000561977	0.00290538	0.000890729	0.00124334	0.00131938	0.00621771	0.00336628	0.00120587	0.00311764	0.000663862	0.00719869			Pcyox1_445_505	0.663492	0.727108	0.566187	1.38307	1.61781	1.1276	0.934504	1.02692	0.834646	1.12157	1.23556	0.842003	0.752295	0.858696	0.679399	0.796128	0.915746	0.713882	1.12077	1.41974	0.900836	1.23774
Onecut1_1545_1612	0	0.00259655	0.00537612	0.00414051	0.0039184	0.00209828	0.00264604	0.00476813	0.0188804	0.00661411	0.0039986	0.00439693	0	0.0133485	0.00671269	0.00166348	0.00424041	0.00234266	0.00317936	0.0118292	0.0040963	0.00351336	0.00194705	0.00212483			Phc1_2592_2656	1.58754	1.61996	1.36422	2.24517	2.25042	1.77486	1.81128	1.77121	1.66309	1.55084	1.48096	1.14169	0.829431	1.21084	1.21584	1.00435	0.889169	0.921151	1.63802	1.55398	1.39597	1.9675
Otx1_3716_3762	0.00131723	0.000314357	0.00205471	0	0.00163273	0.00202393	0.00217812	0.00049834	0.00115725	0.000373968	0.0014659	0.00487568	0.00376353	0.000283214	0.00193831	0.000427595	0.00120663	0.00130329	0.00269034	0.00394035	0.000359027	0.00180759	0.00134058	0.0010113			Phc1_2995_3075	1.5075	1.63364	1.79934	2.7281	2.72155	2.4817	1.8981	1.9167	1.6845	1.19634	1.1646	1.147	1.21361	1.18162	1.34592	1.94675	1.78854	1.5766	2.50078	2.7795	2.39575	1.88608
Otx2_738_815	0	0.000405278	0.00184031	0.00197191	0.000650728	0.00174106	0.00201781	0.00053392	0.000428123	0.00022838	0.000973115	0.000981049	0.00143498	0.000283238	0.00268594	0.000666308	0.000787693	0.000178326	0.00337938	0.0038911	0.000927529	0.000594895	0	0.000251982			Phc2_1767_1833	0.0805906	0.0910337	0.0756932	0.107436	0.105007	0.125005	0.104771	0.126224	0.107558	0.0879717	0.124525	0.0982216	0.0706544	0.0871859	0.0911734	0.0705141	0.0785043	0.0545761	0.0753928	0.125097	0.0776585	0.0995873
Pax7_792_847	0.0190229	0.0205722	0.0222637	0.00133658	0.0115775	0.0158086	0.0101919	0.0104857	0.00351756	0.00604249	0.00438624	0.00782498	0.0231911	0.00343755	0.0216473	0.0166669	0.0187073	0.0264076	0.0220461	0.0265682	0.0126284	0.0173813	0.0257532	0.0308334			Phc2_2215_2290	1.57856	1.54896	1.25964	2.48611	2.37915	2.21884	2.23735	2.07706	2.29084	1.81047	1.70385	1.49176	1.32747	1.36106	1.22027	1.29461	1.12977	1.04115	1.75561	1.80649	1.77094	2.32304
Pcgf2_1227_1281	0.189283	0.157609	0.133242	0.227177	0.298071	0.47029	0.223453	0.174931	0.186534	0.211038	0.147267	0.25134	0.188647	0.222742	0.155977	0.181592	0.199119	0.129707	0.197616	0.136527	0.160826	0.176662	0.249569	0.259474			Phc3_1008_1071	4.9982	5.12716	4.5815	0	0	0	0	0	0	0	5.90587	5.51983	3.66293	3.87322	3.34813	4.60605	3.71044	3.07852	0	5.55771	5.26324	0
Pcgf3_404_461	1.83541	1.52442	3.14466	2.95464	0.786882	0.752491	2.10098	2.12459	2.2469	1.83341	0.478945	0.447155	1.71355	1.51214	1.30784	1.44303	2.04857	2.04176	0.715194	0.673157	4.33377	3.5733	3.01534	2.82607			Phf19_403_461	0.0165728	0.0145829	0.0212476	0.0117496	0.0125169	0.015566	0.0245184	0.0157719	0.0145421	0.0140571	0.0368371	0.019065	0.00236371	0.0241897	0.012774	0.0159351	0.012105	0.0264033	0.0147466	0.0242315	0.0121526	0.0150879
Pcgf3_873_934	2.2896	2.14165	3.12682	3.75346	0.867388	0.960253	2.49382	2.92948	2.42425	2.36748	0.757047	0.726373	2.08457	2.19976	1.77552	2.09033	2.86703	2.69899	0.885609	0.889663	4.53428	4.05339	3.0913	3.57778			Phf19_883_928	0.01342	0.0151948	0.0106282	0.00854988	0.0111133	0.0116259	0.0175117	0.0204051	0.0117271	0.0184426	0.0150176	0.0108995	0.0135007	0.0110299	0.0102582	0.0188307	0.012875	0.0158279	0.00986627	0.0148949	0.0115187	0.0117944
Pcgf5_1100_1161	5.85959	5.02359	6.40708	6.77916	4.79207	5.46749	4.46676	4.07864	6.39276	7.07046	6.72393	6.45908	5.92934	5.88781	5.47451	5.59958	5.22477	4.55996	3.08273	3.10927	6.62173	5.63614	5.6317	6.85173			Phf8_3422_3478	3.89914	3.54601	4.9286	0	0	0	0	0	0	6.24112	6.65336	3.56576	3.4868	3.61606	3.65569	4.37205	3.22342	3.38968	5.09387	4.10907	0	0
Pcyox1_445_505	1.36492	1.28559	1.46998	1.58698	0.464009	0.570625	1.38133	1.37624	1.08264	0.992238	0.1621	0.165514	1.19211	1.27599	1.06689	1.09411	1.28079	1.18878	0.604613	0.585603	1.41614	1.09611	1.41943	1.49803			Ppargc1a_436_523	0.832517	0.814796	0.837725	1.66043	1.9091	1.35171	1.36169	1.09483	1.25326	1.5449	1.25987	1.31036	0.919369	0.906794	0.820521	1.0491	0.860488	0.941464	1.5302	1.65585	1.44944	1.6112
Phc1_2592_2656	0.529009	0.476482	0.854656	0.934753	0.55839	0.599117	0.597368	0.642288	0.496131	0.491064	0.357244	0.556327	0.691422	0.781124	0.559782	0.670828	0.559941	0.622099	0.644145	0.742908	0.526341	0.613961	0.549942	0.67026			Prdm2_452_518	0.628241	0.73111	0.73853	1.53977	1.40877	1.37395	1.4174	1.2789	1.45281	1.2505	1.08137	0.925435	0.81439	0.977869	0.907937	0.76744	0.834159	0.951387	1.22168	1.34593	0.933461	1.21272
Phc1_2995_3075	0.482628	0.557104	0.856717	0.859373	0.140902	0.110865	0.408036	0.405679	0.373701	0.335346	0.0681724	0.0921119	0.427206	0.368517	0.418078	0.375216	0.527662	0.427518	0.162482	0.319556	0.496587	0.489676	0.425241	0.529758			Prdm9_736_822	0.0355027	0.0472068	0.0319026	0.04138	0.0421883	0.0429789	0.0622451	0.051208	0.0387857	0.0743574	0.0658986	0.0718148	0.028252	0.0428964	0.030067	0.0475256	0.0405526	0.0579705	0.061634	0.062062	0.0389091	0.0564562
Phc2_1767_1833	0.0376881	0.0502613	0.0438746	0.0515712	0.0352912	0.025873	0.0951643	0.0740495	0.0628396	0.068621	0.0293728	0.057016	0.0492124	0.0482462	0.0382519	0.0377388	0.0357573	0.0467779	0.0425817	0.0652357	0.0536057	0.0421624	0.0643267	0.0571303			Prmt2_1844_1900	7.28584	5.94358	6.26396	0	0	0	0	0	0	6.47266	5.33427	5.34618	0	0	0	0	0	0	0	0	0	0
Phc2_2215_2290	0.73519	0.698316	0.955962	0.992004	0.286776	0.412349	1.30919	1.39354	0.951717	0.94509	0.399257	0.467717	0.766904	0.755643	0.419456	0.646355	0.835838	0.80694	0.17456	0.267138	1.19637	0.931042	1.19855	1.23255			Prmt2_514_584	2.11556	1.45008	1.58443	4.68959	0	3.35803	2.47072	1.8826	1.89632	1.06133	1.01015	0.980017	1.22121	1.45554	1.35513	2.54919	1.97917	1.95254	3.91086	3.24141	2.91819	3.01042
Phc3_1008_1071	1.78081	1.61496	1.53549	1.85447	1.90359	2.22229	2.09226	2.40148	1.54628	1.36695	2.34909	2.42406	1.86631	1.91027	1.56493	1.69989	1.16832	1.21271	0.865185	1.08932	1.81936	1.86997	2.49534	3.02944			Prmt5_218_266	1.43296	1.41053	1.21929	3.33852	2.88662	2.95043	2.3354	1.77295	2.2527	1.61894	1.22075	1.24378	1.31686	1.5819	1.13196	1.84461	2.18764	1.71052	3.26417	2.98209	2.2377	2.7267
Phf19_403_461	0.00743122	0.00877959	0.0177621	0.0145732	0.00886068	0.0184083	0.0224918	0.0122531	0.0050627	0.0115257	0.0164184	0.0175695	0.0149897	0.0166297	0.00661383	0.00277749	0.0178773	0.00506731	0.0266717	0.0233269	0.0069274	0.0152277	0.00960054	0.00831747			Prmt5_539_601	1.14669	1.4052	1.45529	2.61234	3.44243	3.17669	1.61501	2.08471	2.03355	1.26613	1.54208	1.38714	1.05705	1.3261	1.2034	1.28622	1.63233	1.29039	2.18922	2.676	2.38558	2.25683
Phf19_883_928	0.0193262	0.0181382	0.0103771	0.00620306	0.0165315	0.0282855	0.0201326	0.0239457	0.00620215	0.015175	0.0156081	0.011082	0.0226737	0.0157775	0.0173965	0.011574	0.0191337	0.00401346	0.0143413	0.00497526	0.0132656	0.00438567	0.0112325	0.017139			Prmt6_160_223	0.167209	0.161011	0.133132	0.266348	0.384939	0.227355	0.216873	0.289064	0.232904	0.180137	0.168596	0.128143	0.147425	0.18295	0.171027	0.214239	0.180411	0.14957	0.300135	0.286732	0.269977	0.214607
Phf8_3422_3478	0.84792	0.692647	0.925357	1.09956	0.31235	0.419994	1.06067	1.06841	0.586831	0.647391	0.46436	0.287632	0.909945	0.795806	0.636983	0.646987	0.687578	0.704688	0.427823	0.463319	1.00131	0.922682	1.19265	1.28891			Prmt6_679_752	0.260404	0.300077	0.351014	0.524511	0.782468	0.594353	0.438026	0.381837	0.43934	0.454835	0.390953	0.291499	0.282801	0.340453	0.316781	0.388451	0.368002	0.378731	0.52303	0.483546	0.520992	0.567094
Ppargc1a_436_523	1.74529	1.63854	1.20401	1.49786	0.487001	0.572714	3.0616	2.7741	0.93676	0.909527	0.37741	0.336161	2.40875	2.55407	0.89017	1.04326	3.022	3.29238	0.744814	0.799211	1.8484	1.64269	2.47021	3.03256			Prmt7_444_505	0.144631	0.156445	0.153065	0.271132	0.265047	0.224832	0.178916	0.154975	0.144845	0.130476	0.133617	0.114152	0.152267	0.102589	0.126514	0.167786	0.171918	0.163794	0.219729	0.263581	0.20555	0.214826
Prdm2_452_518	0.215739	0.264635	0.407596	0.447171	0.175246	0.225645	0.307221	0.23901	0.351052	0.293592	0.187912	0.260581	0.357307	0.287862	0.226895	0.263949	0.282454	0.288664	0.291398	0.2557	0.307535	0.274903	0.338496	0.42406			Rbbp4_764_856	3.26422	2.38021	2.74394	1.6423	2.4108	0	3.80865	2.58361	3.09472	2.52949	2.15301	2.06659	3.21508	3.23236	3.15973	1.77185	1.0368	2.4822	1.64958	2.08061	0	3.69872
Prdm9_736_822	0.0628709	0.0558109	0.116216	0.0556013	0.0521979	0.0491054	0.0621038	0.0796987	0.0716436	0.0589152	0.0621914	0.0774943	0.0540203	0.027006	0.0675076	0.0870933	0.0677127	0.067773	0.0699266	0.0859211	0.0792078	0.0634024	0.057658	0.0781672			Rbbp7_869_929	7.11688	0	6.4718	0	0	0	0	0	0	4.62596	4.89686	3.3157	0	0	0	0	0	0	0	0	0	0
Prmt2_1844_1900	0.436203	0.419761	0.760482	0.615329	0.153809	0.252418	0.642085	0.465514	0.428516	0.310745	0.095879	0.0955564	0.354193	0.433691	0.404111	0.345293	0.687108	0.390534	0.229332	0.313858	0.677437	0.470192	0.530261	0.427303			Ring1_663_724	1.14634	0.913361	1.04988	1.42148	1.44474	1.21614	1.12796	1.16778	1.45331	1.44418	1.57308	1.13233	0.9647	0.7727	1.04761	1.55267	1.11401	0.938377	1.2254	1.5383	1.065	1.4026
Prmt2_514_584	0.0523268	0.0444278	0.116629	0.0988699	0.0463482	0.0962467	0.108019	0.0814675	0.0401385	0.0584341	0.0322952	0.0200435	0.0785281	0.0961972	0.0699592	0.076148	0.0689293	0.0823306	0.0399211	0.0274594	0.0829203	0.0751808	0.0990265	0.0974695			Rnf168_852_1082	1.25865	1.00547	1.05388	3.09131	3.01466	2.90134	1.96115	1.73616	1.67673	1.67158	1.8393	1.95956	0.951677	1.06111	1.03784	1.03179	1.23512	1.06334	2.05946	2.11778	1.78575	2.26078
Prmt5_218_266	1.73122	2.06494	2.59143	2.46423	1.63059	1.50034	2.55451	2.24214	1.58729	1.59211	1.51294	1.3333	1.90442	1.80478	1.84524	1.53972	2.06401	2.00671	1.23486	1.06566	2.83557	2.54502	2.73011	2.51593			Rnf2_563_624	2.32113	2.99212	2.52229	0	0	0	0	0	0	0	0	3.01971	0	0	3.47641	0	0	0	0	0	0	0
Prmt5_539_601	1.57764	1.5094	1.96161	2.14718	1.02329	1.04964	2.25333	2.26435	1.36369	1.3785	1.16002	1.20051	1.6165	1.66194	1.41069	1.65635	1.67837	1.61856	0.887132	0.847558	2.08348	1.87642	2.12105	2.52397			Rnf20_791_864	0.949766	0.779395	0.872072	2.65172	2.06294	1.95308	1.74754	1.33824	1.49641	1.28205	1.301	0.961213	1.00412	1.30933	1.08847	1.26234	1.18598	1.1619	1.91382	2.19229	1.59579	1.82664
Prmt6_160_223	0.0192588	0.0289318	0.0597981	0.0572047	0.0275165	0.00581727	0.0399148	0.0394445	0.0480286	0.00934227	0.0079141	0.00826859	0.041287	0.0472737	0.0238802	0.0395958	0.0384314	0.059116	0.0287882	0.00245922	0.0295338	0.0452541	0.0315979	0.0620803			Rnf24_603_668	0.291103	0.27987	0.201614	0.926577	0.780885	0.806881	0.785796	0.607723	0.529679	0.355983	0.371881	0.430901	0.407569	0.28421	0.32094	0.459823	0.633609	0.369394	0.740819	0.965169	0.625231	0.496348
Prmt6_679_752	0.116517	0.106905	0.156775	0.170451	0.0725932	0.0873948	0.13658	0.106349	0.106297	0.0960899	0.0392944	0.0692257	0.133489	0.113235	0.146041	0.11618	0.136743	0.144287	0.145252	0.0883896	0.140002	0.111837	0.0890091	0.195708			Rnf26_1944_2025	0.374731	0.415138	0.453268	0.578292	0.63606	0.00396726	0.407415	0.417263	0.413447	0.389818	0.373438	0.33014	0.372293	0.415242	0.340034	0.520487	0.549976	0.53954	0.554918	0.00259608	0.00196826	0.550805
Prmt7_444_505	0.1399	0.140754	0.215883	0.220872	0.0801494	0.105316	0.227157	0.192829	0.136336	0.144871	0.0962338	0.0912468	0.162062	0.147583	0.130172	0.141481	0.183379	0.181937	0.151174	0.149964	0.189613	0.183772	0.192247	0.216417			Rnf31_454_501	0.180537	0.162988	0.18453	0.38315	0.326847	0.338804	0.489452	0.366326	0.32554	0.292425	0.271343	0.179363	0.163477	0.247289	0.183448	0.202561	0.16512	0.160507	0.235751	0.31805	0.250501	0.423403
Rbbp4_764_856	1.7321	1.68935	2.13965	2.1707	0.942803	1.26736	2.30688	2.12256	1.98513	1.95864	1.23042	1.22499	1.64851	1.88579	1.333	1.19633	1.98687	1.86477	0.602836	0.607041	2.98065	2.39875	2.90915	3.96177			Rnf31_556_608	0.181695	0.196758	0.210877	0.28833	0.290168	0.236807	0.300136	0.296969	0.251616	0.293803	0.278398	0.232664	0.187159	0.214372	0.199815	0.141593	0.174866	0.141817	0.270516	0.248556	0.21602	0.309526
Rbbp7_1405_1475	0	0	0	0	22.6539	22.842	0	0	0	0	19.0271	16.0236	0	0	0	0	0	0	13.4042	14.5733	0	0	0	0			Rnf32_1384_1446	1.44021	1.35636	1.20638	2.71654	3.25631	2.43011	1.96527	1.90338	2.07527	1.53256	1.32673	1.21887	1.63701	1.47852	1.41785	3.09186	2.65049	2.73755	2.54716	2.5609	1.96587	2.11391
Rbbp7_869_929	13.353	12.1531	0	0	5.94439	6.45832	0	10.1264	12.1265	12.8245	4.27088	4.21899	10.3391	10.989	10.4047	9.96937	11.6758	11.2265	2.04046	2.02959	0	0	0	0			Rnf34_1198_1265	2.42109	2.50962	2.91341	0	0	0	3.20903	3.76411	3.31148	2.42236	2.78856	2.28414	3.21502	5.15951	3.49621	0	6.96635	5.25824	0	0	0	3.63708
Ring1_663_724	2.04491	1.85889	2.91295	1.93376	1.37458	1.30715	2.39852	2.49629	2.50634	2.07358	2.18765	1.54606	2.78426	3.35237	1.38925	1.97579	2.72478	2.80277	2.92828	3.00468	3.3718	2.57071	2.7679	3.04155			Rnf34_264_317	2.86905	2.88298	3.47663	4.4926	5.16087	4.81691	3.39317	3.14788	3.02955	3.14294	2.98055	2.65449	3.04795	2.89626	2.82647	4.02513	3.24062	3.33767	4.62172	0	3.93154	3.43339
Rnf168_852_1082	0.443306	0.367612	0.419521	0.573353	0.103829	0.120695	0.42951	0.435153	0.293418	0.306048	0.0731584	0.0668554	0.3651	0.439441	0.298906	0.299335	0.326756	0.320123	0.0458936	0.0862822	0.470062	0.464171	0.53523	0.620364			Rnf38_375_455	0.0989552	0.126342	0.145287	0.215396	0.232125	0.223404	0.195436	0.208605	0.224799	0.39084	0.249915	0.253962	0.10594	0.0901786	0.138952	0.208354	0.15909	0.146471	0.174679	0.202093	0.181643	0.280809
Rnf2_563_624	2.65068	2.40233	3.23904	3.67303	0	0	2.21076	1.70465	2.8115	2.78373	2.35668	1.60007	2.64428	2.51281	1.86367	1.14044	2.96117	3.00824	0.220105	0.0984209	3.97151	3.8371	4.07244	3.53817			Rnf38_745_814	1.06645	1.12018	0.947072	1.97981	2.14853	1.97468	1.77323	1.75264	1.74129	1.61847	1.8711	1.52569	0.801439	1.14725	0.754515	0.857376	0.980711	1.1069	1.53192	2.01352	1.33824	1.74341
Rnf20_791_864	0.34131	0.230259	0.337819	0.364391	0.125484	0.143217	0.44066	0.440135	0.240515	0.212516	0.14112	0.161712	0.250489	0.292823	0.240196	0.248653	0.325018	0.311681	0.213081	0.226843	0.424755	0.290602	0.334538	0.403356			Rnf39_1085_1138	0.0293352	0.0499452	0.0534119	0.0549857	0.0656824	0.0612897	0.0673743	0.0970669	0.0757717	0.0972953	0.0707143	0.0571119	0.0603781	0.0728224	0.0296844	0.160115	0.127844	0.1237	0.0982159	0.15227	0.131447	0.0692276
Rnf24_603_668	0.0692791	0.0395618	0.0387243	0.0337301	0.0565539	0.0598905	0.0647806	0.0173193	0.0901021	0.0614359	0.0164563	0.0428309	0.0825648	0.0796337	0.0333206	0.0633674	0.0885383	0.116759	0.0222633	0.0545711	0.0535255	0.084948	0.0957558	0.126104			Rnf39_933_981	0.0456978	0.0964251	0.2311	0.572308	0.212573	0.250834	0.437374	0.15855	0.386876	0.261837	0.465123	0.23063	0	0.330501	0.0481066	0.682922	0.471967	0.446003	0.403309	0.547867	0.505434	0.290062
Rnf26_1944_2025	0.117346	0.085342	0.0960075	0.130804	0.0802561	0.0787878	0.122421	0.113791	0.0797996	0.0859918	0.0623157	0.0616478	0.0989318	0.110222	0.104218	0.0692789	0.0758107	0.071472	0.0483396	0.0291777	0.00195379	0.100337	0.00380584	0.00784567			Rnf40_1576_1656	0.541803	0.530343	0.696139	1.01507	1.05885	0.819003	1.09915	0.824498	0.902401	0.893082	0.908393	0.849721	0.467422	0.637207	0.542115	0.510756	0.538157	0.418526	0.761723	0.775879	0.726615	0.925854
Rnf31_454_501	0.0778177	0.0762635	0.142775	0.120529	0.0373776	0.060435	0.101114	0.0722496	0.0796941	0.0687072	0.055916	0.047832	0.123075	0.101814	0.140301	0.0481106	0.125969	0.0973718	0.0714458	0.0633981	0.117499	0.0845407	0.094524	0.123753			Rock1_3708_3785	1.07527	1.03066	1.25888	2.26257	2.30696	2.31869	1.83375	1.44932	1.59846	1.07656	1.11128	0.982068	0.924401	1.20782	0.902353	1.66349	1.47965	1.4302	2.20707	2.24971	1.73437	1.87373
Rnf31_556_608	0.139064	0.0936309	0.0860482	0.114462	0.0664308	0.100891	0.134065	0.111589	0.0972988	0.073893	0.150305	0.12631	0.140394	0.115476	0.0981039	0.0713116	0.0804386	0.139282	0.0738294	0.110457	0.131588	0.107173	0.128779	0.19282			Rock1_4642_4709	0.992344	0.712098	0.970229	2.09584	1.9721	1.81472	1.33836	1.14341	1.31898	0.610505	0.390023	0.470547	0.912435	1.31601	1.23004	2.27856	2.01969	1.98344	2.12049	2.71026	1.89467	1.33212
Rnf32_1384_1446	0.102406	0.0848062	0.101012	0.126893	0.0603531	0.0909382	0.0953328	0.0970835	0.122135	0.101738	0.027892	0.0224339	0.111165	0.103104	0.0916539	0.0926512	0.0937201	0.0598591	0.101005	0.0851762	0.0970965	0.0820831	0.0660044	0.0944053			Rock1_5898_5970	6.1676	6.26717	6.57931	0	0	0	7.46139	0	0	0	5.61672	4.14084	6.42103	0	6.25176	0	0	0	0	0	6.76067	0
Rnf34_1198_1265	1.75485	1.76615	1.84637	1.87501	1.2357	1.32454	1.39523	1.62584	1.79694	1.80018	1.07635	0.898612	1.59542	1.68093	1.56749	1.64578	1.58801	1.47495	0.572501	0.594956	2.13326	1.7659	2.05643	2.31888			Rybp_648_701	0.997247	0.848748	0.928632	1.88525	1.86629	1.63437	1.45357	1.66096	1.6321	1.3933	1.00507	0.952427	0.815997	1.04694	0.936968	1.28767	1.1206	1.11249	1.73486	1.61855	1.54058	1.6833
Rnf34_264_317	3.2697	2.65724	2.54489	3.16236	2.73643	3.40005	2.9752	2.73638	2.71251	2.62785	2.38402	2.65471	2.58365	3.09765	3.03739	2.69975	2.71906	2.87481	4.19701	5.95357	2.44838	2.46336	2.67417	3.02988			Scmh1_2543_2599	0.186984	0.203775	0.297324	0.48228	0.509962	0.546424	0.268893	0.395932	0.360722	0.310052	0.248204	0.273734	0.239493	0.201787	0.174454	0.276029	0.249475	0.221576	0.469954	0.394348	0.318041	0.357103
Rnf38_1885_1951	0.53997	0.401313	0.6192	0.613483	0.627555	0.570813	0.226885	0.585791	0.457883	0.531309	0.811385	0.439444	0.544584	0.441734	0.367659	0.394048	0.445992	0	0.446251	0.160681	0.472524	0.462522	0.754039	0.75135			Setd1a_6185_6236	5.36392	5.86481	4.13007	0	0	5.16636	0	5.65655	4.89635	0	0	0	6.2249	4.67621	2.98456	8.32774	7.21016	4.96934	0	0	5.39711	0
Rnf38_375_455	0.0674131	0.131299	0.126554	0.154274	0.0600306	0.0741333	0.1571	0.127141	0.0502836	0.0945607	0.046466	0.069242	0.133606	0.104221	0.0549604	0.104419	0.0736627	0.0680596	0.0260674	0.0632535	0.137963	0.127599	0.119505	0.13999			Setd2_1635_1691	0.656021	0.386736	0.375028	2.25448	1.84403	0	1.83817	1.06735	1.27634	0.941668	0.494859	0.63181	0	0.7904	0	1.26619	0.688802	0	1.42778	1.41565	0	1.5993
Rnf38_745_814	0.737432	0.762938	0.745852	0.961721	0.672379	0.664188	0.837476	1.02109	0.437272	0.615404	0.602266	0.498664	1.28227	0.837078	0.67891	0.629494	0.584415	0.616739	0.343367	0.550365	0.92741	0.748049	0.849224	1.0478			Setd2_468_514	2.59383	2.4725	1.69045	3.90502	5.71348	4.87025	3.67021	4.80614	4.29363	4.1213	3.57271	3.64522	1.54548	2.18664	1.72321	2.12919	2.30961	1.60927	3.93155	3.87868	3.21202	4.20238
Rnf39_1085_1138	0.0117072	0.0184301	0.0256167	0.0092267	0.0134228	0.0153698	0.00840126	0.0081699	0.023645	0.0251755	0.0776279	0.0758834	0.0182046	0.0250444	0.0034529	0.0118312	0.0121838	0.00548855	0.0242423	0.00934512	0.0250711	0.0299961	0.0225785	0.022869			Setd7_625_689	1.3017	1.55817	1.42497	3.36421	3.31217	2.77719	2.82636	2.43881	2.67924	2.61472	1.92769	1.6154	1.69982	1.79867	1.73653	2.1466	1.66361	1.58832	3.23604	3.13178	2.25957	3.63038
Rnf39_933_981	0	0.106307	0	0	0.031532	0.00174419	0	0	0.0347384	0.00357253	0.106996	0	0.117904	0	0	0	0	0	0	0	0.0327657	0.00522714	0	0.0219395			Setd8_595_685	1.52745	1.32689	1.34043	2.78522	2.92655	2.26475	2.22344	2.08306	1.96795	1.18586	0.983378	0.85734	1.3956	1.29987	1.30338	1.48901	1.28261	1.21975	2.4203	2.89596	2.19	2.36341
Rnf40_1576_1656	0.419004	0.413217	0.534461	0.469658	0.503973	0.445796	0.697991	0.691077	0.45566	0.406426	0.510254	0.471972	0.52933	0.493132	0.462015	0.500469	0.400225	0.440547	0.478367	0.417791	0.332719	0.411879	0.440601	0.440536			Setdb1_1184_1231	0.680708	0.556138	0.526121	1.35079	1.91792	1.61845	1.43142	1.40674	1.07888	0.769035	0.9849	0.840855	0.661844	0.964525	0.680478	0.748856	0.923793	0.691744	1.193	1.24042	0.948939	1.43827
Rock1_3708_3785	0.391925	0.329667	0.389553	0.565628	0.232437	0.297149	0.414276	0.434767	0.249052	0.347443	0.263384	0.283844	0.395345	0.362209	0.297756	0.296381	0.377296	0.369472	0.308116	0.156423	0.567909	0.432686	0.542143	0.614983			Setdb1_867_940	0.449413	0.312559	0.466458	1.10213	0.988337	1.03139	0.891734	0.929089	0.89418	0.71735	0.746084	0.75914	0.516579	0.599763	0.841426	0.545437	0.482265	0.660919	0.769357	0.835111	0.730267	0.911026
Rock1_4642_4709	0.494779	0.546903	0.538684	0.528088	0.791425	0.793756	0.445996	0.396536	0.537549	0.56025	0.664771	0.690028	0.643241	0.685112	0.563687	0.551184	0.527767	0.620034	0.21745	0.259189	0.753157	0.687689	0.899667	0.910222			Setdb2_1307_1378	0.182095	0.187842	0.166136	0.445636	0.357414	0.287186	0.262664	0.254179	0.342402	0.306184	0.279383	0.294728	0.16065	0.258429	0.171671	0.240972	0.321971	0.248423	0.458296	0.456565	0.318921	0.323435
Rock1_5898_5970	3.13654	3.35252	3.49051	3.74084	5.57168	6.14928	3.17739	3.56693	3.0612	2.78369	5.86648	5.07435	4.18327	3.92334	3.53475	4.0025	4.13761	4.00167	8.76263	8.02761	3.42286	3.27772	3.10759	3.57991			Setdb2_1737_1843	0.102551	0.133175	0.122592	0.237347	0.330243	0.215635	0.280488	0.22552	0.196233	0.219524	0.212725	0.17052	0.180913	0.177999	0.155627	0.306681	0.258941	0.237148	0.382243	0.380716	0.246333	0.237739
Rybp_370_443	0	0.00858251	0.00904262	0	0	0.0134196	0	0	0	0	0	0	0	0	0.0357369	0.0191973	0.0111372	0	0.0988848	0.0220448	0.0185979	0	0.00784716	0			Setmar_817_949	0.388345	0.416569	0.356331	0.995572	1.10705	0.939602	0.742784	0.636443	0.716109	0.691336	0.705963	0.547689	0.809196	0.851785	0.690458	1.6652	1.31301	1.35436	1.83715	2.16895	1.66243	0.939141
Rybp_648_701	0.359502	0.349069	0.362848	0.387442	0.272493	0.263994	0.440285	0.414178	0.406661	0.341345	0.180399	0.290249	0.424177	0.48606	0.329315	0.363974	0.344343	0.366417	0.186005	0.190857	0.390852	0.329647	0.375176	0.443821			Sf3b1_1731_1821	2.14082	2.4534	2.4061	0	0	5.57231	3.92507	4.63094	4.27683	2.86192	2.91683	3.22917	2.4936	3.67512	2.83472	4.58077	5.01909	4.46147	5.14584	0	5.54603	3.86777
Scmh1_2543_2599	0.166955	0.163014	0.176509	0.169118	0.0939145	0.133395	0.205187	0.20583	0.176078	0.143928	0.0947819	0.0920466	0.175584	0.154177	0.139357	0.149008	0.131073	0.132677	0.0735071	0.117504	0.206827	0.185042	0.158589	0.232648			Sfmbt1_1881_1942	0.319952	0.253748	0.304568	1.43133	1.28369	1.128	0.730054	0.645375	0.740141	0.574016	0.561512	0.4548	0.421297	0.620393	0.393487	0.7427	0.60968	0.600203	1.18733	1.09866	0.870271	0.956619
Setd1a_6185_6236	1.91794	1.9565	2.15535	2.38313	2.66681	2.70677	2.17498	2.04389	2.1513	1.8934	2.68423	2.79381	2.52519	2.52781	2.23019	2.43629	1.66379	1.52394	2.02688	2.28322	1.77961	1.66183	1.89854	1.66918			Sirt1_2065_2205	0.317913	0.293775	0.392296	0.777417	1.01326	0.766973	0.541745	0.562481	0.500584	0.312441	0.343487	0.274535	0.396739	0.51339	0.451222	0.764984	0.735598	0.614307	0.965294	1.06516	0.813253	0.572623
Setd2_1635_1691	0.591396	0.292048	0.73232	0.525843	0.454159	0.460293	0.561757	0.433161	0.532888	0.319246	0.73188	0.438819	0.407478	0.437692	0.233965	0.291382	0.547578	0.383776	0.519206	0.246515	0.502502	0.341388	0.583682	0.396409			Sirt2_36_102	2.6698	2.63477	2.63825	1.69737	1.77891	1.66468	0	2.79461	2.98575	0	0	0	1.19486	1.33119	1.36861	1.18478	1.00784	1.05329	1.16037	1.25144	0.829158	0
Setd2_468_514	0.665004	0.446265	0.777696	0.624978	0.519724	0.539518	0.886817	0.782715	0.358163	0.374451	0.62857	0.569069	0.743497	0.627686	0.458934	0.492954	0.494304	0.491582	0.31646	0.393991	0.512461	0.473047	0.54961	0.861802			Sirt3_715_827	0	0	4.44174	0	0	0	0	4.45184	3.62443	5.90953	4.96452	4.07643	4.81682	4.26682	2.53664	0	5.90161	4.89443	0	0	5.24312	0
Setd7_625_689	4.72065	4.18889	8.06671	8.57698	1.42686	1.63862	5.9117	5.68839	4.92438	4.78769	0.938787	0.795582	4.0544	4.18801	3.96598	4.3754	5.84585	6.07404	0.860764	0.896958	7.96414	7.59962	5.74394	6.16011			Sirt3_887_959	4.13193	4.22637	4.30462	0	0	0	0	0	0	0	0	0	3.39732	3.54853	3.90282	0	0	4.65986	0	0	0	0
Setd8_595_685	5.52128	5.97331	8.10704	7.98157	1.48024	1.57893	4.46413	4.36909	3.85644	3.67468	1.54753	10.5435	5.34152	6.02806	4.96088	4.52438	4.37052	4.88363	0.648265	1.998	5.09413	4.88254	4.38971	5.55774			Sirt4_1041_1103	0.423471	0.349803	0.385208	0.818977	0.755377	0.609639	0.565472	0.508954	0.526324	0.600906	0.495431	0.379959	0.361458	0.480431	0.468425	0.760796	0.749727	0.661906	0.674871	0.755341	0.619628	0.639398
Setdb1_1184_1231	0.232099	0.194421	0.362577	0.300297	0.125562	0.117131	0.375779	0.403687	0.218627	0.140515	0.165263	0.165393	0.251467	0.299544	0.243709	0.220116	0.336727	0.20972	0.212241	0.194991	0.315688	0.211453	0.262581	0.321555			Sirt5_662_794	1.61083	1.35466	1.53868	3.57375	3.72527	2.88383	2.42013	2.04275	2.08795	1.36539	1.66045	1.48872	1.44069	1.62506	1.65508	2.67729	2.73005	2.95105	3.37429	3.70278	3.02992	2.63262
Setdb1_867_940	0.306731	0.206287	0.263052	0.3805	0.187323	0.219072	0.330315	0.356926	0.196797	0.210634	0.140809	0.196292	0.338866	0.406313	0.226992	0.293497	0.263327	0.331446	0.201483	0.173816	0.247314	0.322218	0.205344	0.403755			Sirt6_933_985	0.679285	0.931741	1.03565	1.89745	1.68472	1.97998	1.85494	1.64395	1.89452	1.26637	1.21572	1.24235	1.46738	1.72517	1.41166	2.32152	2.13687	1.42465	1.70428	2.4446	1.92286	1.55121
Setdb2_1307_1378	0.136558	0.158825	0.233441	0.247182	0.118062	0.137342	0.220101	0.243438	0.139082	0.158272	0.18979	0.222793	0.199905	0.20483	0.214505	0.15115	0.230126	0.174358	0.181668	0.154681	0.224575	0.203508	0.257762	0.270228			Sirt7_747_796	1.90395	1.53703	1.48298	2.27541	1.82385	1.89803	1.42446	1.47889	1.44116	1.79038	1.60899	1.66681	1.05794	1.0691	1.06369	1.72453	1.18784	1.50274	2.15366	2.00508	1.74963	2.15613
Setdb2_1737_1843	0.0801211	0.0713888	0.109602	0.110978	0.0351781	0.0325183	0.095703	0.0709015	0.0517916	0.0471558	0.04049	0.0340091	0.0751297	0.0711179	0.0408499	0.056643	0.0743477	0.0755907	0.093494	0.0758283	0.0976581	0.0857343	0.112781	0.126177			Slc14a1_1267_1324	0.197212	0.263215	0.2334	0.302243	0.289291	0.285764	0.204505	0.244572	0.165445	0.146736	0.147212	0.120272	0.181646	0.259406	0.186698	0.377867	0.323189	0.309743	0.457067	0.665472	0.396289	0.286988
Setmar_817_949	0.263344	0.284605	0.378112	0.37337	0.0899517	0.0787243	0.238703	0.267044	0.328698	0.357601	0.128031	0.0999324	0.185171	0.162811	0.232695	0.235129	0.194254	0.279996	0.120229	0.109049	0.427406	0.300675	0.374461	0.311798			Slc14a1_756_836	0.211554	0.235602	0.212241	0.24602	0.300355	0.266686	0.159729	0.160249	0.148848	0.109824	0.103964	0.107032	0.201785	0.200824	0.113864	0.31207	0.264626	0.184018	0.387231	0.37805	0.322106	0.212041
Sf3b1_1731_1821	1.38981	1.21284	1.464	1.46659	1.17226	1.23854	1.57459	1.49768	1.31852	1.3085	1.22556	1.48727	1.61514	1.57998	1.34101	1.15562	1.51349	1.49885	0.720984	0.615683	1.98494	1.81804	2.30196	2.53855			Smyd3_1063_1116	2.73063	2.42767	2.66457	0	5.73682	5.47995	0	3.31769	4.36355	4.25324	2.98893	2.6386	4.50904	4.59723	4.51051	6.37503	5.61773	6.73131	0	0	0	0
Sf3b1_3799_3858	11.4913	9.21017	10.5459	10.1103	8.24891	8.74616	9.21054	9.28696	11.7356	11.232	12.0914	11.4546	11.1344	10.3693	10.9083	11.9557	9.20136	8.57354	5.98747	5.54083	0	10.4302	11.4033	0			Smyd3_794_874	1.1854	1.23837	1.21894	3.10387	3.08334	2.79989	1.97658	1.97938	1.66927	1.68109	1.5756	1.33495	1.92578	2.28901	1.95335	3.0967	2.43707	2.51024	3.18627	4.23181	3.15257	2.40139
Sfmbt1_1881_1942	0.255684	0.248307	0.329147	0.482469	0.100866	0.0886901	0.349775	0.364369	0.244836	0.221384	0.0807674	0.0459117	0.257298	0.258207	0.208454	0.251573	0.253532	0.245852	0.165184	0.123731	0.271985	0.301456	0.28577	0.343095			Sox6_2415_2475	0.482603	0.42472	0.403695	0.864913	0.584628	0.727536	0.548089	0.479597	0.500752	0.404464	0.332384	0.330766	0.315025	0.282831	0.294713	0.457568	0.406185	0.325475	0.461267	0.442945	0.520958	0.812419
Sirt1_2065_2205	0.366314	0.177225	0.345545	0.328859	0.18098	0.196352	0.34385	0.259556	0.320871	0.340637	0.366724	0.413672	0.263217	0.265423	0.231326	0.199986	0.22399	0.2946	0.0872269	0.156361	0.53457	0.49579	0.57249	0.638798			Sox6_561_622	0.496814	0.441152	0.641101	0.708713	0.703277	0.719019	0.78616	0.642046	0.688756	0.622217	0.428968	0.425184	0.540812	0.474884	0.499158	0.601595	0.510805	0.484249	0.656898	0.650374	0.582573	0.936679
Sirt2_1246_1300	8.03754	9.22466	0	0	2.82521	3.23113	9.46631	0	6.85459	8.33252	3.21566	3.73155	8.22972	8.34334	7.04024	7.7544	7.73457	8.95367	3.16999	4.09564	0	8.86739	0	0			Suv420h1_799_855	1.04522	0.864616	0.774695	2.77665	3.75687	2.93289	2.27924	2.6641	2.38688	2.16672	1.82867	1.65188	1.20947	1.39111	1.52045	1.62731	1.49615	1.49838	2.70076	3.45131	3.00201	2.89691
Sirt2_36_102	0.0366608	0.0115339	0.024891	0.0120639	0.0814168	0.104935	0.0110562	0.015287	0.0321178	0.0217906	0.0439792	0.0582177	0.0494372	0.0212321	0.0183886	0.0220265	0.0164445	0.0139457	0.0880414	0.0870157	0.0225053	0.0281808	0.0275294	0.0401284			Taf7_341_430	0.368232	0.362625	0.368759	1.18502	1.04569	1.05856	0.462376	0.419925	0.512735	0.390518	0.258763	0.264226	0.505155	0.428672	0.414951	0.812908	0.707811	0.756984	0.994043	1.1208	1.14096	0.829809
Sirt3_715_827	1.44644	1.81532	2.60168	1.75975	0.795796	0.72857	1.99493	1.42076	0.894073	1.35939	0.111738	0.611132	1.72174	1.32582	0.648861	0.895829	1.90624	0	0.487717	0.358066	1.62662	2.15614	1.36578	2.16406			Tbx3_1627_1702	0.0754626	0.0732177	0.0819855	0.115281	0.100172	0.0995652	0.114999	0.0652248	0.112984	0.0501509	0.0595747	0.0562962	0.0763603	0.0951496	0.047542	0.0933502	0.0561096	0.0690842	0.0849325	0.114746	0.0647832	0.0858789
Sirt3_887_959	1.91466	1.71446	2.37735	2.03232	0.317833	0.329181	2.25539	2.0081	0.919384	0	0.150869	0.129058	1.24691	1.30067	0	0	1.59682	1.35934	0.400631	0.42882	1.4969	1.32816	1.45023	1.40285			Tbx3_3086_3185	0.0853307	0.0410147	0.0622189	0.0646248	0.0720205	0.0577213	0.0557545	0.0736212	0.0723483	0.0390666	0.0410101	0.0368221	0.0347027	0.0436779	0.0393221	0.0429191	0.037377	0.0217679	0.0458167	0.0589309	0.0464399	0.0308296
Sirt4_1041_1103	0.135394	0.152803	0.189285	0.200445	0.0343505	0.0270925	0.15052	0.133624	0.0561562	0.0690823	0.0115207	0.0175545	0.0919711	0.106294	0.0748118	0.0358289	0.106412	0.147073	0.076408	0.0571458	0.135253	0.104649	0.171206	0.134523			Tbx3_933_1074	0.230386	0.263474	0.224733	0.243678	0.234708	0.192026	0.37958	0.252705	0.315282	0.229241	0.199891	0.144469	0.199098	0.191601	0.340691	0.103576	0.128194	0.0986577	0.282836	0.285842	0.180622	0.208989
Sirt5_662_794	1.1813	1.16092	1.25677	1.38887	0.245211	0.227289	1.61461	1.27568	0.773192	0.780901	0.234382	0.233466	0.857849	0.843696	0.498124	0.731541	0.959483	0.715305	0.290374	0.209249	1.54284	1.25372	1.26	1.39095			Tet1_13403_13498	0.432632	0.409054	0.354652	1.16128	0.847025	0.79684	0.577099	0.554822	0.546554	0.325332	0.205251	0.216463	0.41036	0.468685	0.436454	0.882314	0.774823	0.909452	0.846581	1.01569	0.828308	0.75191
Sirt6_933_985	0.760728	0.620383	0.959798	0.677533	0.4607	0.307268	0.512778	0.555032	0.512136	0.667404	0.454927	0.26526	0.855605	0.628247	0.47956	0.888299	0.824884	0.864687	0.513253	0.0980705	0.576869	0.826604	0.481121	0.94268			Tet3_1423_1484	2.15671	2.20544	2.29322	2.51296	2.40953	2.04399	2.66853	2.3799	2.42941	2.87399	2.7895	2.34866	1.17318	1.22864	1.09774	1.34731	1.22123	1.35999	1.59333	1.6937	1.51511	2.7165
Sirt7_747_796	0.0518009	0.0476782	0.0837895	0.100529	0.0429865	0.034392	0.0979878	0.0833599	0.0387465	0.0441183	0.0508027	0.0841178	0.0575083	0.0425859	0.091067	0.0239841	0.045205	0.0454547	0.0702637	0.0814734	0.0600302	0.066139	0.0917083	0.0955335			Uhrf1_1376_1429	0.0629812	0	0	0	0	0	0.818947	0	0	0	0.0129195	0	0.0786847	0.129586	0.0880719	0	0	0	0	0	0	0
Slc14a1_1267_1324	0.00609888	0.0050942	0.00500575	0.00214285	0.00781074	0.00524554	0.00349663	0.00183718	0.00207364	0.00320621	0.00665277	0.00584487	0.00453455	0.00634357	0.00268438	0.00334978	0.00249439	0.00402588	0.00943163	0.00995128	0.00304016	0.00236262	0.00487265	0.0098002			Uhrf1_268_346	0.0671015	0.0485368	0.0354934	0.0833833	0.0854355	0.0707444	0.0769842	0.113167	0.0621476	0.0421072	0.0415329	0.0254256	0.0394877	0.0462746	0.050174	0.0161409	0.0448675	0.0610451	0.0436796	0.0642946	0.0528361	0.161527
Slc14a1_756_836	0.00605412	0.00572205	0.00460852	0.00558037	0.00699134	0.00561341	0.00440665	0.00261512	0.00581164	0.0059073	0.00575365	0.00713401	0.00713188	0.0056418	0.0068168	0.00453848	0.00593249	0.0100758	0.0253778	0.0195861	0.00456203	0.00537135	0.00509977	0.00677944			Whsc1_164_210	2.33017	2.06752	2.71069	7.30079	0	0	0	0	0	4.76271	4.11437	3.40397	3.74749	3.99116	3.66411	4.74972	4.10459	3.41895	0	0	0	6.23076
Smyd3_1063_1116	0.284192	0.332015	0.401509	0.510383	0.162469	0.115985	0.281043	0.271496	0.175046	0.254308	0.0789926	0.0596662	0.202679	0.266443	0.20092	0.193462	0.280643	0.283588	0.116641	0.137648	0.326315	0.270054	0.392066	0.445001			Whsc1_527_600	1.7412	1.91462	1.79161	5.41276	5.35341	5.39374	4.63395	3.39331	4.48415	2.68061	2.59695	1.95008	2.66251	2.53378	2.68139	3.52166	3.28986	2.63984	0	6.61114	4.53922	4.11268
Smyd3_794_874	0.123875	0.119255	0.129745	0.166468	0.0468637	0.0463602	0.156041	0.120033	0.124415	0.0976828	0.0299874	0.0386562	0.091383	0.124893	0.0984505	0.0793845	0.147542	0.116107	0.0938716	0.166437	0.173697	0.160834	0.218592	0.154333			Yy1_1130_1223	2.33671	2.58419	2.33519	4.40242	4.0829	4.39576	3.07309	2.7905	2.68063	2.34426	2.0934	1.81443	2.39503	3.04903	2.44753	3.73952	3.08827	3.3472	4.6849	5.32437	3.5742	3.81341
Sox2_1608_1685	2.9343	1.47923	1.58345	1.70899	2.13514	2.34178	1.26838	1.19434	1.54857	0	2.05595	2.00596	1.69782	1.6813	1.88411	1.96084	1.65329	1.53843	4.34357	4.99337	1.27886	1.21568	1.06981	1.24607			Zic2_1329_1416	0.256813	0.214807	0.188098	0.305361	0.459812	0.353211	0.368345	0.378893	0.279685	0.396749	0.243431	0.162997	0.124058	0.215216	0.127047	0.202162	0.183513	0.183948	0.226352	0.342212	0.265234	0.376917
Sox6_2415_2475	3.13603	3.38677	4.43903	4.80339	1.99361	2.52267	3.12107	3.52207	3.63657	3.32468	2.43196	2.66079	2.96228	3.39145	3.13287	3.02418	3.40834	3.5803	2.12245	2.33016	3.31853	3.02455	2.96375	3.57094
Sox6_561_622	1.63112	1.44179	2.33587	2.91384	0.425638	0.445383	1.81822	1.84131	1.27415	1.28711	0.585577	0.428938	1.47234	1.36754	1.21417	1.21445	1.68922	1.859	0.835624	1.12139	1.81672	1.56523	1.36273	1.63868
Suv420h1_799_855	0.357617	0.345097	0.500578	0.536873	0.170891	0.145532	0.434179	0.489115	0.421086	0.271646	0.334165	0.263084	0.390561	0.461271	0.176357	0.206168	0.508524	0.341716	0.195748	0.186412	0.412898	0.457379	0.509579	0.612532
Taf7_341_430	0.61108	0.585606	0.9239	0.815154	0.234073	0.304826	0.679983	0.537296	0	0	0.305662	0.2082	0.764258	0	0.473859	0	0.768667	0.786964	0.143056	0.119467	0.602344	0.618171	0.713498	0.704306
Tbx3_1627_1702	0.281532	0.349609	0.282749	0.243507	0.153995	0.167759	0.364604	0.34216	0.110651	0.132226	0.0594804	0.0505222	0.264635	0.329305	0.16173	0.0951008	0.331112	0.362772	0.136332	0.156427	0.157579	0.135583	0.269142	0.319631
Tbx3_3086_3185	0.130851	0.178484	0.133963	0.125603	0.224482	0.15865	0.283787	0.281351	0.0640924	0.0733343	0.0552589	0.0636749	0.133493	0.165681	0.0745805	0.0580024	0.134504	0.0983984	0.0702403	0.157778	0.0602635	0.0712975	0.110431	0.259266
Tbx3_933_1074	1.26933	1.24023	0.886792	0.812106	1.84722	1.76941	1.37629	1.15778	0.603094	0.477488	0.622432	0.551621	1.14145	1.47693	0.689515	0.740521	1.01154	0.942749	0.478604	0.441432	0.582159	0.397479	1.55007	1.78187
Tet1_13403_13498	0.120212	0.156032	0.161428	0.173428	0.100382	0.11667	0.0444242	0.00920872	0.0695706	0.0266261	0.0173438	0.0344979	0.0610137	0.0826277	0.107671	0.0743388	0.135449	0.11087	0.0170458	0.0537136	0.126685	0.148104	0.127812	0.160014
Tet3_1423_1484	0.357496	0.295632	0.49702	0.569665	0.324982	0.355619	0.282388	0.308738	0.232693	0.24969	0.166908	0.179203	0.342016	0.410882	0.338029	0.303951	0.32093	0.356827	0.279355	0.258204	0.348267	0.305434	0.391247	0.372841
Uhrf1_1376_1429	0.0820082	0.0299369	0.0343632	0.00646122	0.0592939	0.0118336	0.0367648	0.0787294	0.0576648	0.0314781	0.011144	0.021926	0.0127178	0.00931591	0.0136705	0.0574838	0.0272276	0.0552324	0.033253	0.0349339	0.00705099	0.044296	0.0408868	0.0230958
Uhrf1_268_346	0.0281852	0.016686	0.00249065	0.0203914	0.0154916	0.0178809	0.0104154	0.0147958	0.00111673	0.00784553	0.0107026	0.015166	0.0232756	0.0145858	0.0116003	0.0106212	0.0207317	0.0183277	0.0145691	0.0250857	0.0129682	0.00704646	0.0117509	0.0108651
Whsc1_164_210	0.184077	0.0924647	0.128186	0.204846	0.195358	0.153525	0.281569	0.21009	0.0743884	0.114889	0.104634	0.113113	0.166131	0.208795	0.159758	0.132123	0.188262	0.172756	0.170247	0.0999488	0.166549	0.135208	0.155835	0.154453
Whsc1_527_600	0.108097	0.113121	0.151156	0.201906	0.126914	0.12224	0.17038	0.193627	0.117645	0.137568	0.0581819	0.0732297	0.148077	0.153475	0.112654	0.103916	0.184548	0.162445	0.0890917	0.0548731	0.159673	0.16755	0.160226	0.22043
Yaf2_766_837	6.81371	5.92753	7.25342	6.75636	6.64346	7.75947	0	6.29583	0	8.54757	6.37933	6.15892	6.6354	6.95045	0	7.22923	5.77597	5.47732	2.9032	0	0	0	0	0
Yy1_1130_1223	2.57658	2.25374	3.0286	2.69839	0.987556	1.22247	3.15377	2.86058	2.84644	2.76132	1.39688	1.54079	2.79054	3.1562	2.03938	2.39373	2.4974	2.25875	1.805	1.7996	3.72218	3.20608	3.48499	3.6145
Zic2_1329_1416	0.00932057	0.0267277	0.00470568	0.00420613	0.00574179	0.0382939	0.0252563	0.00594396	0.00289204	0.0018584	0.00346194	0.0074905	0.006459	0.00382485	0.00559707	0.00909366	0.00382723	0.00291209	0.0134719	0.00921705	0.00175569	0.0248204	0.0193312	0.027023
[truncated: 37 more columns]
